# Supplementary material
Source: PubMed Central journal article supplement (PMC4858938)

Shatsky et al.,  
supplemental Dataset S19  
additional MS/MS Spectra

## Legend

- The vast majority of MS spectra for proteins reported in supplemental Dataset S2 are provided in the Skyline spectral library at PanoramaWeb. The small minority of single peptide hit identifications that could not be uploaded to PanoramaWeb are presented here.
- The following information is provided at the top of the spectra: protein name and peptide sequence; Experiment ID; Experiment type (in solution or in gel); Mass spectrometer used;  $m/z$  value; delta error (ppm); modifications; missed cleavages; Mascot Ion Score ; Mascot expect value. Alternative matches for the same spectrum are reported, if applicable.
- Spectra that are annotated as representing “Competitor IDs” refer to peptides that were identified on the basis of spectral evidence for which multiple sequence matches are possible (with identical or very similar confidence).
- Annotation of  $y$ - and  $b$ -type product ions is provided.
- ProteinProspector tools (<http://prospector.ucsf.edu>) (Chalkley et al.) were used to calculate theoretical monoisotopic masses and  $m/z$  values for product ions. (Chalkley RJ, Hansen KC, Baldwin MA. Bioinformatic methods to exploit mass spectrometric data for proteomic applications. Methods in enzymology. 2005;402:289-312.)

### DVU0120\_TFLQAR

Experiment ID: L10095\_35\_670 ; Experiment Type: INSOL; Mass spectrometer: Orbitrap  
m/z: 368.703; TheorMW (Da): 735.3916; delta: -0.1 ppm; missed cleav: 0; mods: Deamidation (NQ);  
IonScore: 35.5; expect value: 1.63E-03  
Competitor ID: DVU0961\_FTLAER

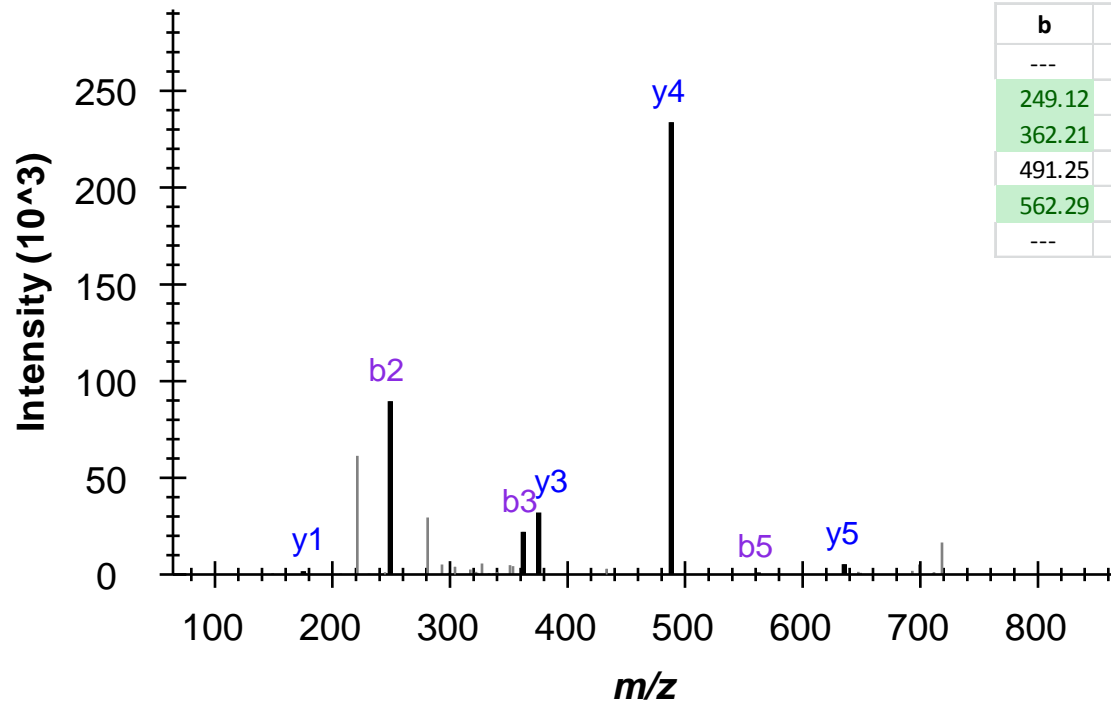

| b      |   |                |   | y      | y <sup>+2</sup> |
|--------|---|----------------|---|--------|-----------------|
| ---    | 1 | <b>T</b>       | 6 | ---    | ---             |
| 249.12 | 2 | <b>F</b>       | 5 | 635.35 | 318.18          |
| 362.21 | 3 | <b>L</b>       | 4 | 488.28 | 244.65          |
| 491.25 | 4 | <b>Q-&gt;E</b> | 3 | 375.20 | 188.10          |
| 562.29 | 5 | <b>A</b>       | 2 | 246.16 | 123.58          |
| ---    | 6 | <b>R</b>       | 1 | 175.12 | 88.06           |

# DVU0142\_MFLESLAR

Experiment ID: L7103\_26\_492 ; Experiment Type: INSOL; Mass spectrometer: LTQ  
m/z: 491.91; TheorMW (Da): 981.4954; delta: 316 ppm; missed cleav: 0; mods: Oxidation (M);  
IonScore: 39.3; expect value: 2.65E-00

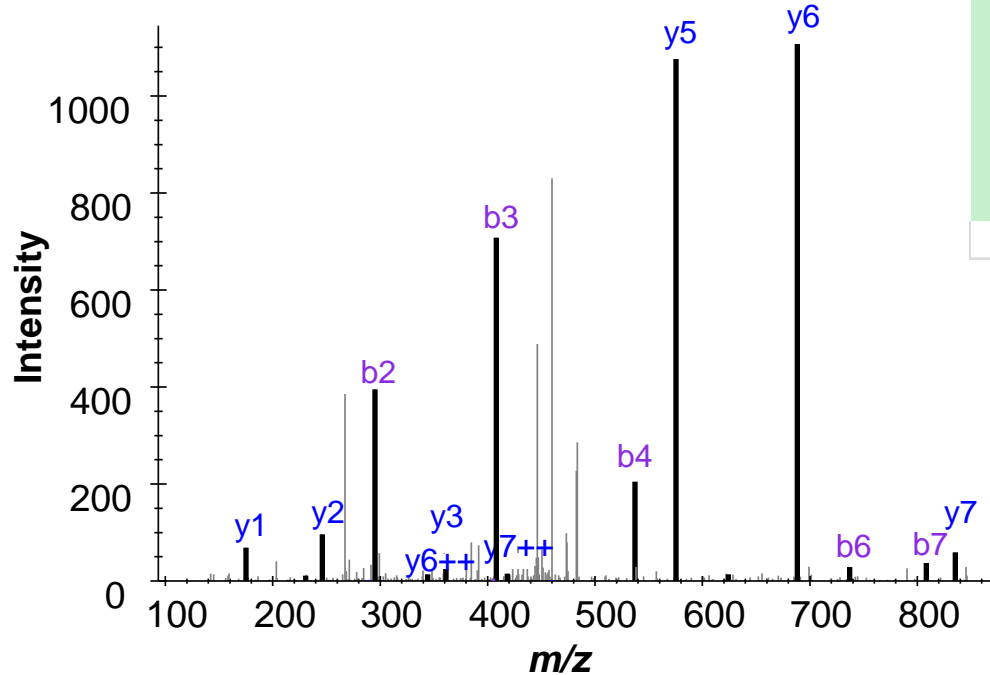

| b      |   |          |   | y      | y <sup>+2</sup> |
|--------|---|----------|---|--------|-----------------|
| ---    | 1 | <b>m</b> | 8 | ---    | ---             |
| 295.11 | 2 | <b>F</b> | 7 | 835.47 | 418.24          |
| 408.20 | 3 | <b>L</b> | 6 | 688.40 | 344.70          |
| 537.24 | 4 | <b>E</b> | 5 | 575.31 | 288.16          |
| 624.27 | 5 | <b>S</b> | 4 | 446.27 | 223.64          |
| 737.35 | 6 | <b>L</b> | 3 | 359.24 | 180.12          |
| 808.39 | 7 | <b>A</b> | 2 | 246.16 | 123.58          |
| ---    | 8 | <b>R</b> | 1 | 175.12 | 88.06           |

### DVU0165\_PLLNLR

Experiment ID: L22896\_71\_1263 ; Experiment Type: INSOL; Mass spectrometer: Orbitrap  
m/z: 363.729; TheorMW (Da): 725.4436; delta: -0.1 ppm; missed cleav: 0; mods: Deamidation (NQ);  
IonScore: 28.01; expect value: 6.17E-03

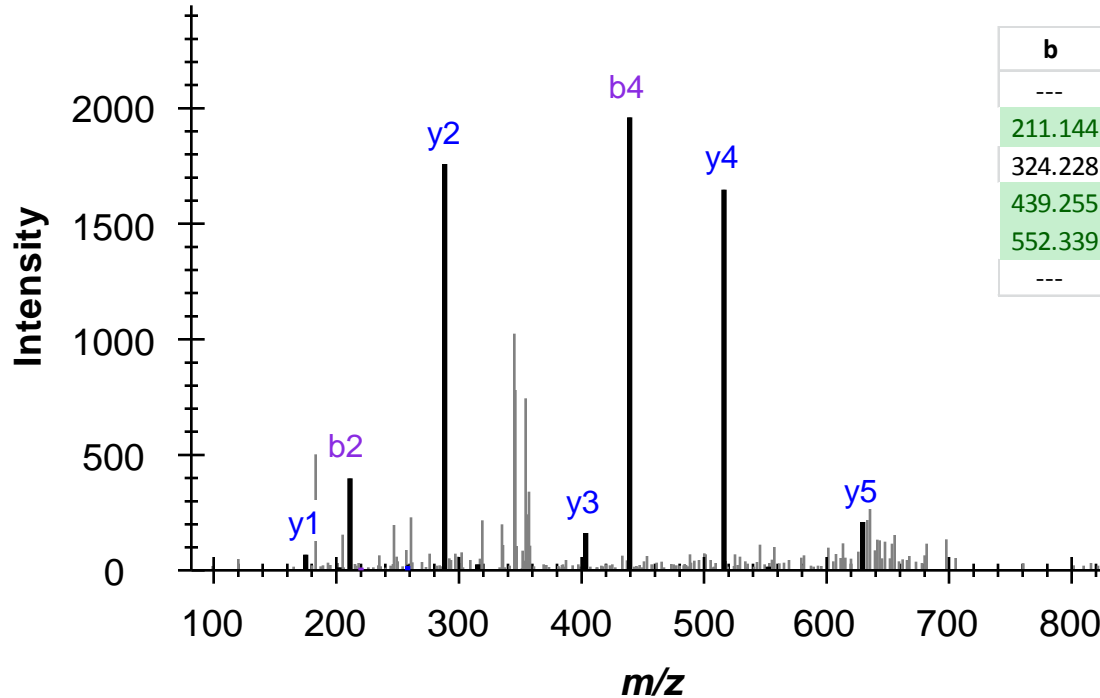

| b       |   |      |   | y       | y <sup>+2</sup> |
|---------|---|------|---|---------|-----------------|
| ---     | 1 | P    | 6 | ---     | ---             |
| 211.144 | 2 | L    | 5 | 629.398 | 315.203         |
| 324.228 | 3 | L    | 4 | 516.314 | 258.661         |
| 439.255 | 4 | N->D | 3 | 403.23  | 202.119         |
| 552.339 | 5 | L    | 2 | 288.203 | 144.605         |
| ---     | 6 | R    | 1 | 175.119 | 88.0631         |

### DVU0271\_QGGSGVGLLTVRR

Experiment ID: L23134\_74\_1313 ; Experiment Type: INSOL; Mass spectrometer: Orbitrap  
m/z: 642.357; TheorMW (Da): 1282.6994; delta: 0.1 ppm; missed cleav: 1; mods: [Q-16];  
IonScore: 22.28; expect value: 1.69E-02

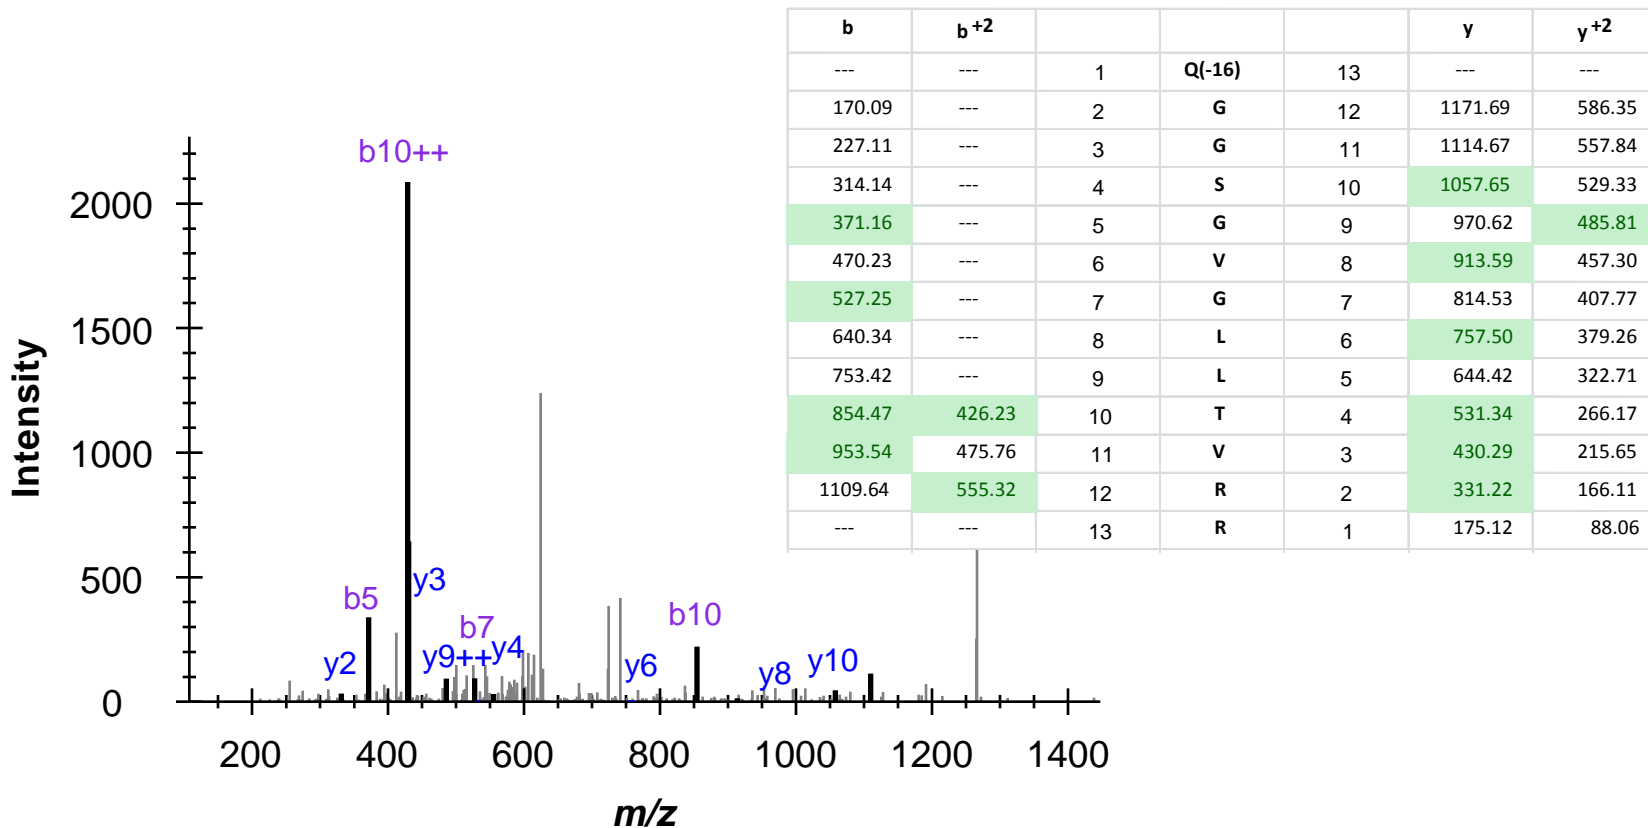

### DVU0327\_RIPVDQIR

Experiment ID: L19564\_60\_1073 ; Experiment Type: INSOL; Mass spectrometer: Orbitrap  
m/z: 499.293; TheorMW (Da): 996.5717; delta: -0.2 ppm; missed cleav: 1; mods: Deamidation (NQ);  
IonScore: 19.89; expect value: 2.82E-02

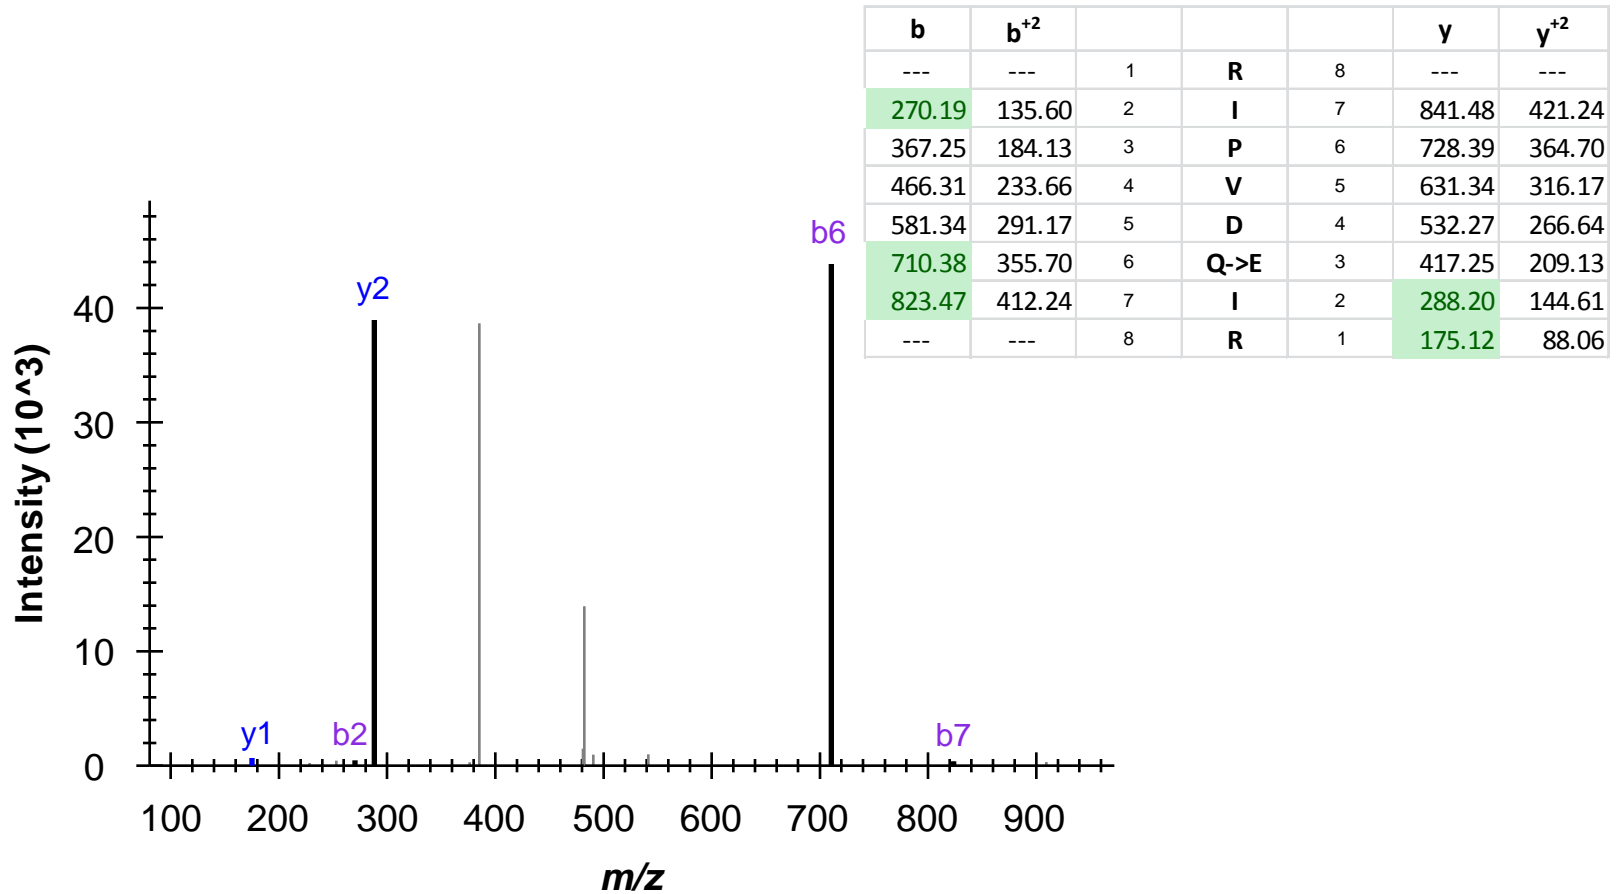

### DVU0359\_MINVSETALK

Experiment ID: L9313\_33\_626 ; Experiment Type: INSOL; Mass spectrometer: Orbitrap  
m/z: 561.296; TheorMW (Da): 1120.58; delta: -2.1 ppm; missed cleav: 0; mods: Oxidation (M);  
IonScore: 19.41; expect value: 3.8E-02

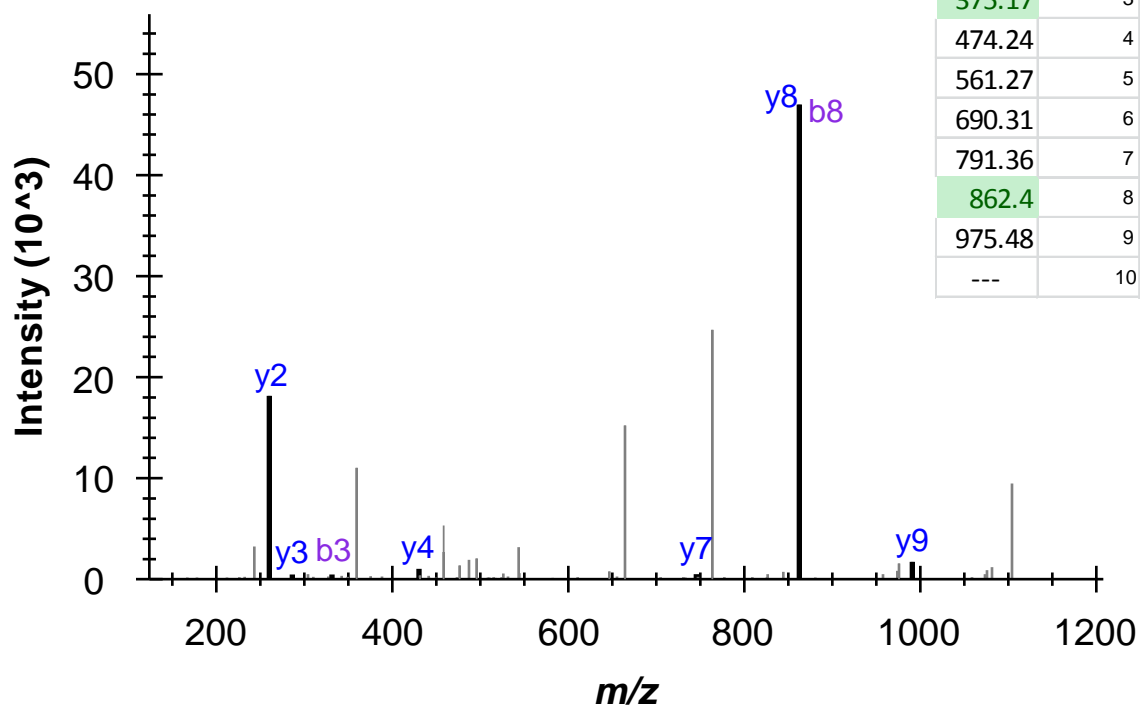

| b      |    |          |    | y      | y <sup>+2</sup> |
|--------|----|----------|----|--------|-----------------|
| ---    | 1  | <b>m</b> | 10 | ---    | ---             |
| 261.13 | 2  | <b>I</b> | 9  | 974.55 | 487.78          |
| 375.17 | 3  | <b>N</b> | 8  | 861.47 | 431.24          |
| 474.24 | 4  | <b>V</b> | 7  | 747.42 | 374.22          |
| 561.27 | 5  | <b>S</b> | 6  | 648.36 | 324.68          |
| 690.31 | 6  | <b>E</b> | 5  | 561.32 | 281.17          |
| 791.36 | 7  | <b>T</b> | 4  | 432.28 | 216.64          |
| 862.4  | 8  | <b>A</b> | 3  | 331.23 | 166.12          |
| 975.48 | 9  | <b>L</b> | 2  | 260.2  | 130.6           |
| ---    | 10 | <b>K</b> | 1  | 147.11 | 74.06           |



### DVU0422\_ALLER

Experiment ID: L16657\_54\_960 ; Experiment Type: INSOL; Mass spectrometer: Orbitrap  
m/z: 357.729; TheorMW (Da): 713.4436; delta: -0.1 ppm; missed cleav: 0; mods: none;  
IonScore: 31.59; expect value: 2.25E-03  
Competitor ID: DVU3294\_LAILER

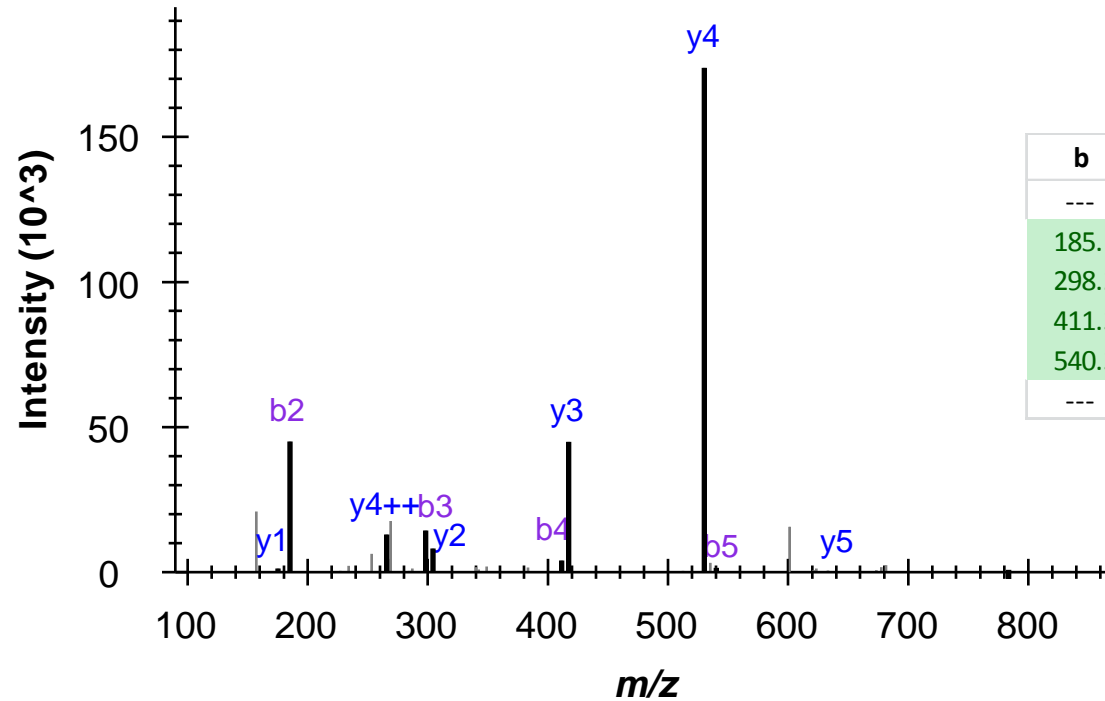

| b      |   |          |   | y      | y <sup>+2</sup> |
|--------|---|----------|---|--------|-----------------|
| ---    | 1 | <b>A</b> | 6 | ---    | ---             |
| 185.13 | 2 | <b>L</b> | 5 | 643.41 | 322.21          |
| 298.21 | 3 | <b>L</b> | 4 | 530.33 | 265.67          |
| 411.30 | 4 | <b>L</b> | 3 | 417.25 | 209.13          |
| 540.34 | 5 | <b>E</b> | 2 | 304.16 | 152.58          |
| ---    | 6 | <b>R</b> | 1 | 175.12 | 88.06           |

### DVU0445\_LGMFNR

Experiment ID: L11438\_40\_750 ; Experiment Type: INSOL; Mass spectrometer: Orbitrap  
m/z: 377.681; TheorMW (Da): 753.348; delta: -0.7 ppm; missed cleav: 0; mods: Deamidation (NQ); Oxidation (M);  
IonScore: 22.58; expect value: 1.32E-02

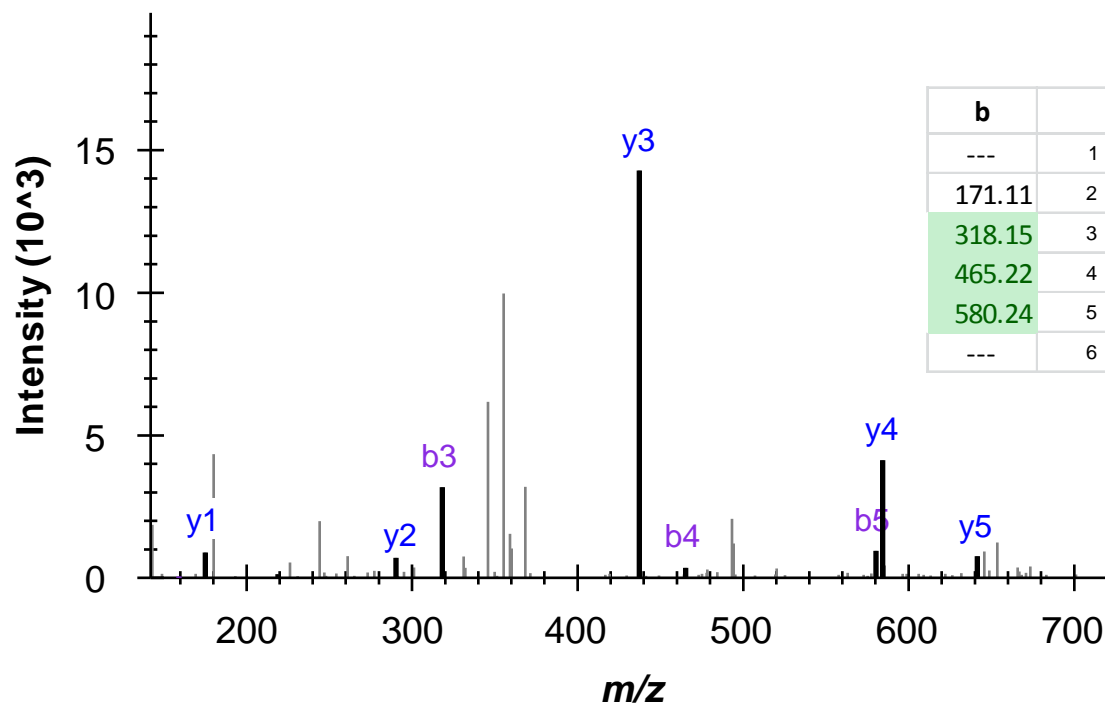

| b      |   |                |   | y      | y <sup>+2</sup> |
|--------|---|----------------|---|--------|-----------------|
| ---    | 1 | <b>L</b>       | 6 | ---    | ---             |
| 171.11 | 2 | <b>G</b>       | 5 | 641.27 | 321.14          |
| 318.15 | 3 | <b>m</b>       | 4 | 584.25 | 292.63          |
| 465.22 | 4 | <b>F</b>       | 3 | 437.21 | 219.11          |
| 580.24 | 5 | <b>N-&gt;D</b> | 2 | 290.15 | 145.58          |
| ---    | 6 | <b>R</b>       | 1 | 175.12 | 88.06           |

### DVU0500\_ELSGGLSR

Experiment ID: L10537\_37\_697 ; Experiment Type: INSOL; Mass spectrometer: Orbitrap  
m/z: 409.722; TheorMW (Da): 817.4294; delta: 0.1 ppm; missed cleav: 0; mods: none;  
IonScore: 23; expect value: 4.99E-02

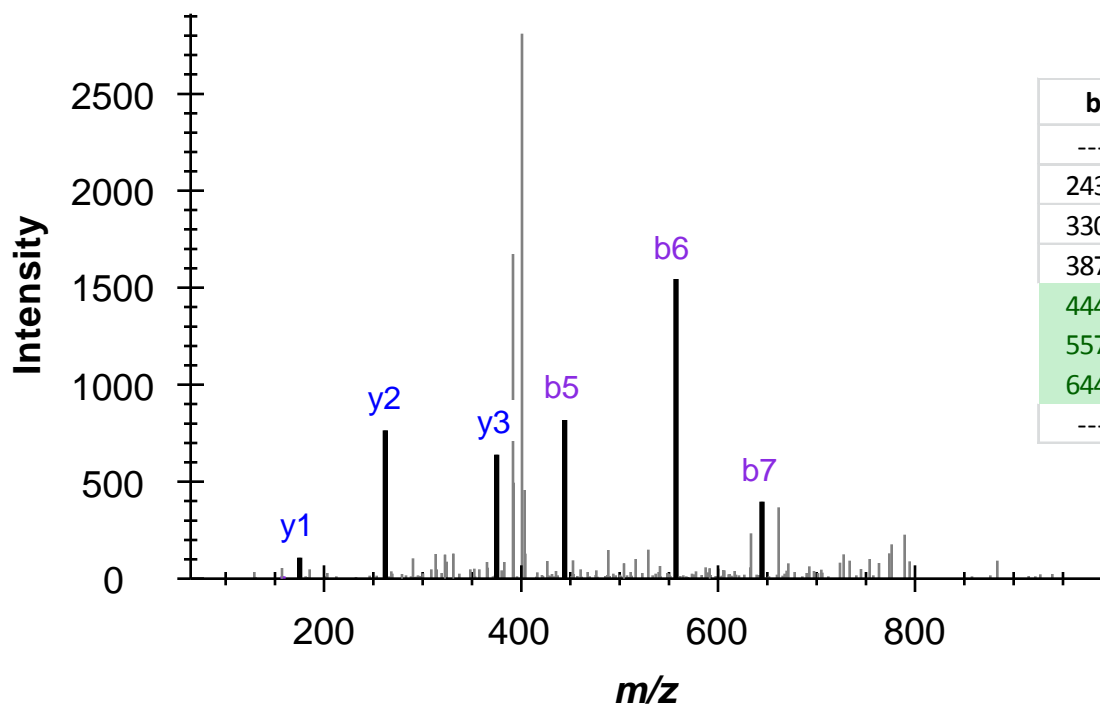

| <b>b</b> |   |          |   | <b>y</b> | <b>y<sup>+2</sup></b> |
|----------|---|----------|---|----------|-----------------------|
| ---      | 1 | <b>E</b> | 8 | ---      | ---                   |
| 243.13   | 2 | <b>L</b> | 7 | 689.39   | 345.20                |
| 330.17   | 3 | <b>S</b> | 6 | 576.31   | 288.66                |
| 387.19   | 4 | <b>G</b> | 5 | 489.28   | 245.14                |
| 444.21   | 5 | <b>G</b> | 4 | 432.26   | 216.63                |
| 557.29   | 6 | <b>L</b> | 3 | 375.24   | 188.12                |
| 644.33   | 7 | <b>S</b> | 2 | 262.15   | 131.58                |
| ---      | 8 | <b>R</b> | 1 | 175.12   | 88.06                 |

### DVU0503\_LIDRPIR

Experiment ID: L12832\_44\_837 ; Experiment Type: INSOL; Mass spectrometer: Orbitrap  
m/z: 441.78; TheorMW (Da): 881.5447; delta: 0.9 ppm; missed cleav: 1; mods: none;  
IonScore: 18.41; expect value: 4.04E-02

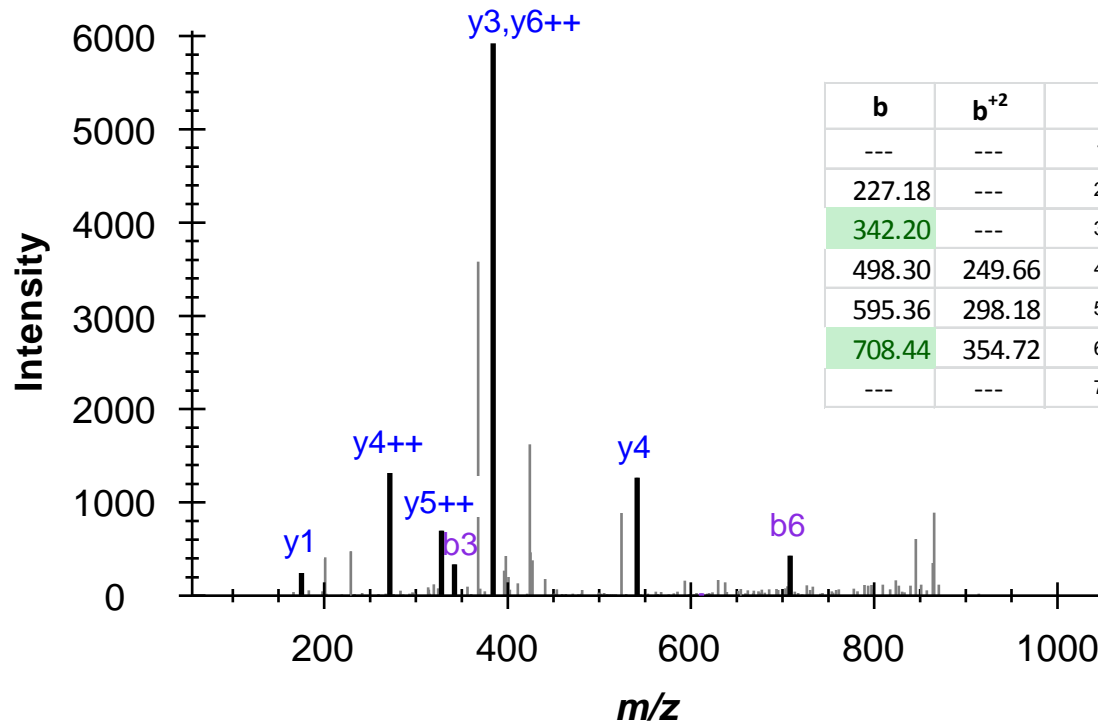

| b      | b <sup>+2</sup> |   |          |   | y      | y <sup>+2</sup> |
|--------|-----------------|---|----------|---|--------|-----------------|
| ---    | ---             | 1 | <b>L</b> | 7 | ---    | ---             |
| 227.18 | ---             | 2 | <b>I</b> | 6 | 769.47 | 385.24          |
| 342.20 | ---             | 3 | <b>D</b> | 5 | 656.38 | 328.70          |
| 498.30 | 249.66          | 4 | <b>R</b> | 4 | 541.36 | 271.18          |
| 595.36 | 298.18          | 5 | <b>P</b> | 3 | 385.26 | 193.13          |
| 708.44 | 354.72          | 6 | <b>I</b> | 2 | 288.20 | 144.61          |
| ---    | ---             | 7 | <b>R</b> | 1 | 175.12 | 88.06           |

### DVU0680\_LLNLDR

Experiment ID: L21723\_69\_1238 ; Experiment Type: INSOL; Mass spectrometer: Orbitrap  
m/z: 428.767; TheorMW (Da): 855.518; delta: 2 ppm; missed cleav: 0; mods: none;  
IonScore: 21.64; expect value: 2.3E-02

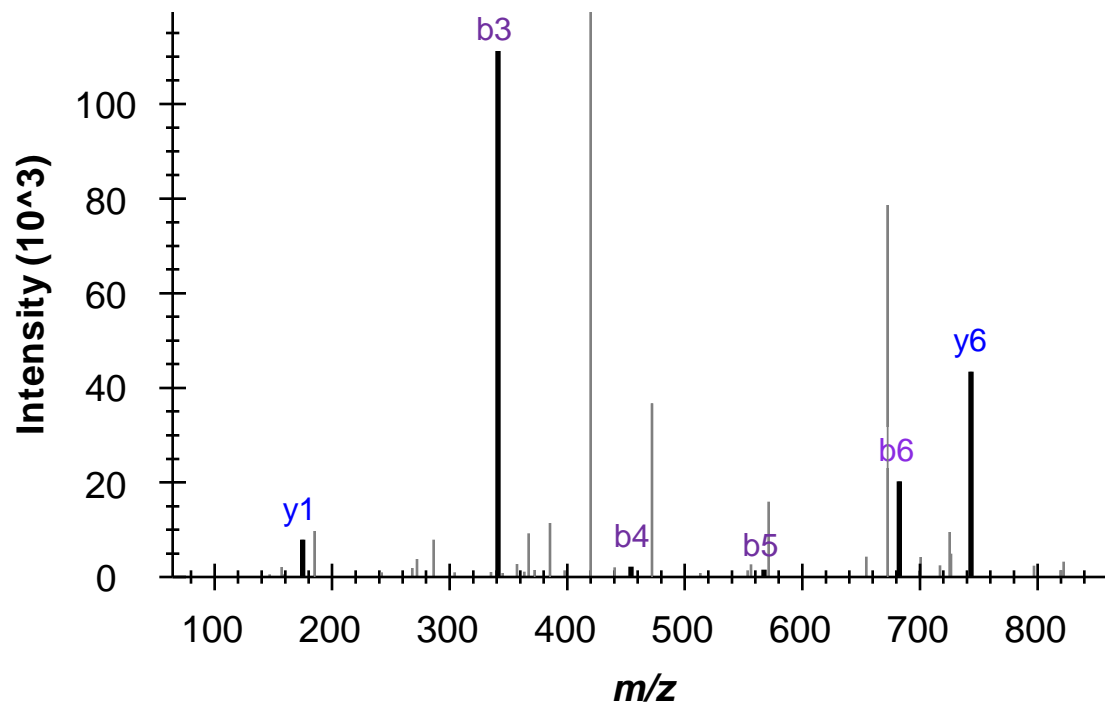

| b      |   |   |   | y      | y <sup>+2</sup> |
|--------|---|---|---|--------|-----------------|
| ---    | 1 | L | 7 | ---    | ---             |
| 227.18 | 2 | L | 6 | 743.44 | 372.22          |
| 341.22 | 3 | N | 5 | 630.36 | 315.68          |
| 454.3  | 4 | L | 4 | 516.31 | 258.66          |
| 567.39 | 5 | L | 3 | 403.23 | 202.12          |
| 682.41 | 6 | D | 2 | 290.15 | 145.58          |
| ---    | 7 | R | 1 | 175.12 | 88.06           |

### DVU0855\_QRAGALMDDIK

Experiment ID: L9398\_33\_631 ; Experiment Type: INSOL; Mass spectrometer: Orbitrap  
m/z: 401.2; TheorMW (Da): 1200.58; delta: 0 ppm; missed cleav: 1; mods: [Q-16];  
IonScore: 20.71; expect value: 3.90E-02

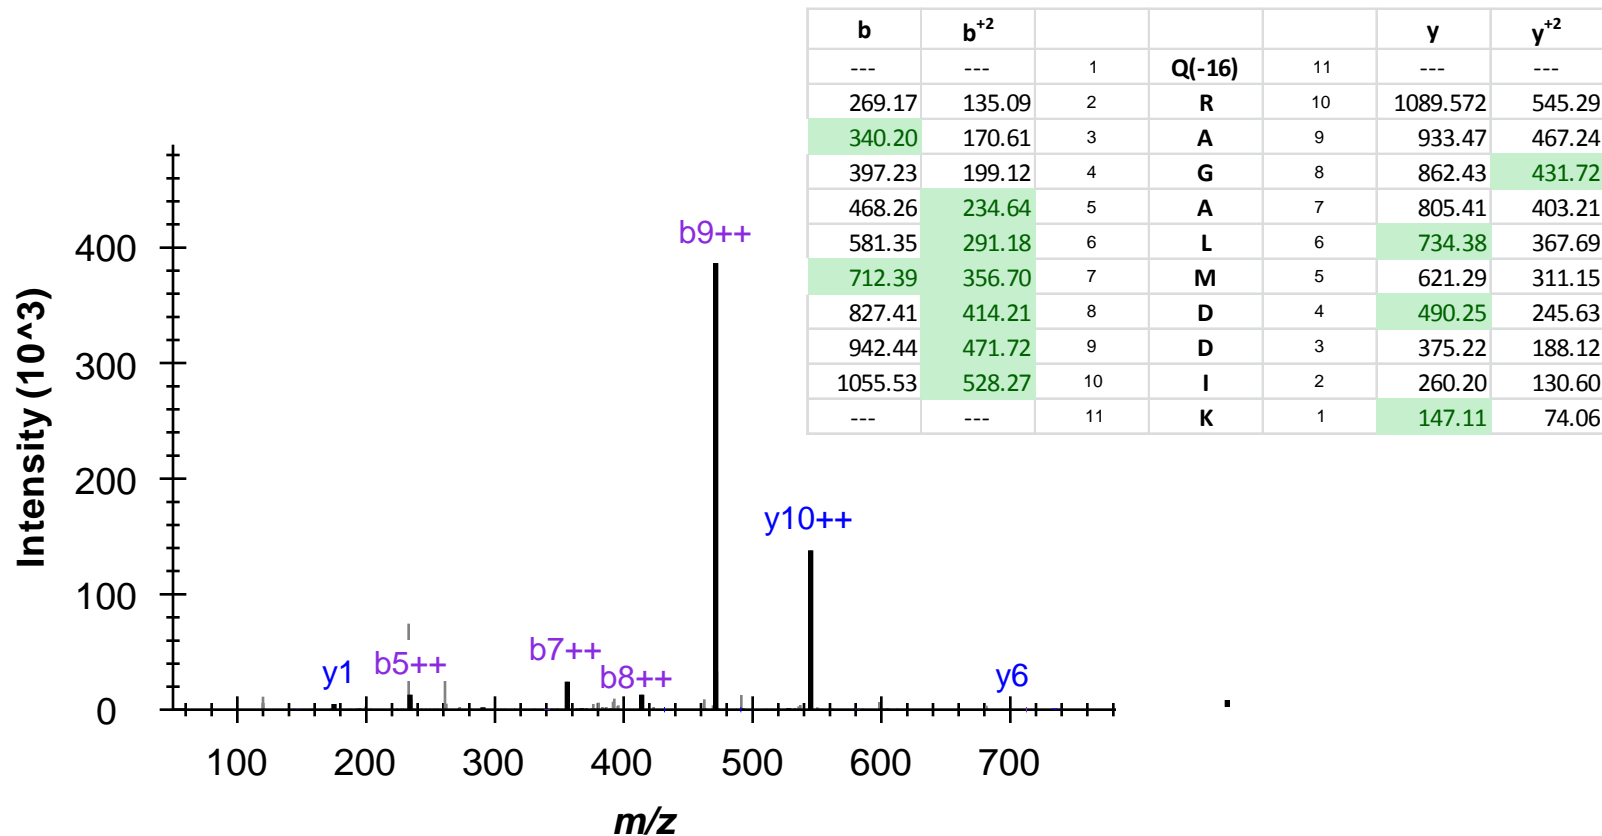

### DVU0870\_RDANEQLK

Experiment ID: L21825\_70\_3224 ; Experiment Type: INGEL; Mass spectrometer: LTQ  
m/z: 487.242; TheorMW (Da): 972.4989; delta: -30.2 ppm; missed cleav: 1; mods: none;  
IonScore: 34.57; expect value: 4.35E-02

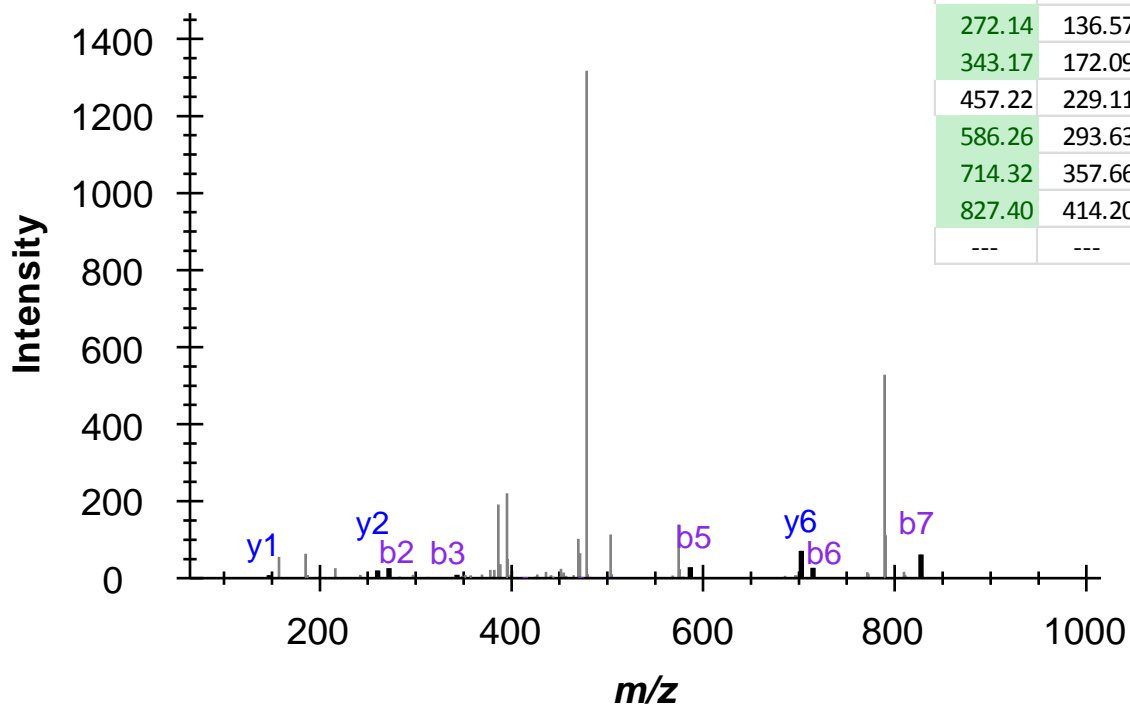

| <b>b</b> | <b>b<sup>+2</sup></b> |   |          |   | <b>y</b> | <b>y<sup>+2</sup></b> |
|----------|-----------------------|---|----------|---|----------|-----------------------|
| ---      | ---                   | 1 | <b>R</b> | 8 | ---      | ---                   |
| 272.14   | 136.57                | 2 | <b>D</b> | 7 | 817.41   | 409.21                |
| 343.17   | 172.09                | 3 | <b>A</b> | 6 | 702.38   | 351.69                |
| 457.22   | 229.11                | 4 | <b>N</b> | 5 | 631.34   | 316.17                |
| 586.26   | 293.63                | 5 | <b>E</b> | 4 | 517.30   | 259.15                |
| 714.32   | 357.66                | 6 | <b>Q</b> | 3 | 388.26   | 194.63                |
| 827.40   | 414.20                | 7 | <b>L</b> | 2 | 260.20   | 130.60                |
| ---      | ---                   | 8 | <b>K</b> | 1 | 147.11   | 74.06                 |

### DVU0961\_FTLAER

Experiment ID: L10095\_35\_670 ; Experiment Type: INSOL; Mass spectrometer: Orbitrap  
m/z: 368.703; TheorMW (Da): 735.3916; delta: -0.1 ppm; missed cleav: 0; mods: none;

IonScore: 32.63; expect value: 3.17E-03

Competitor ID: DVU0120\_TFLQAR

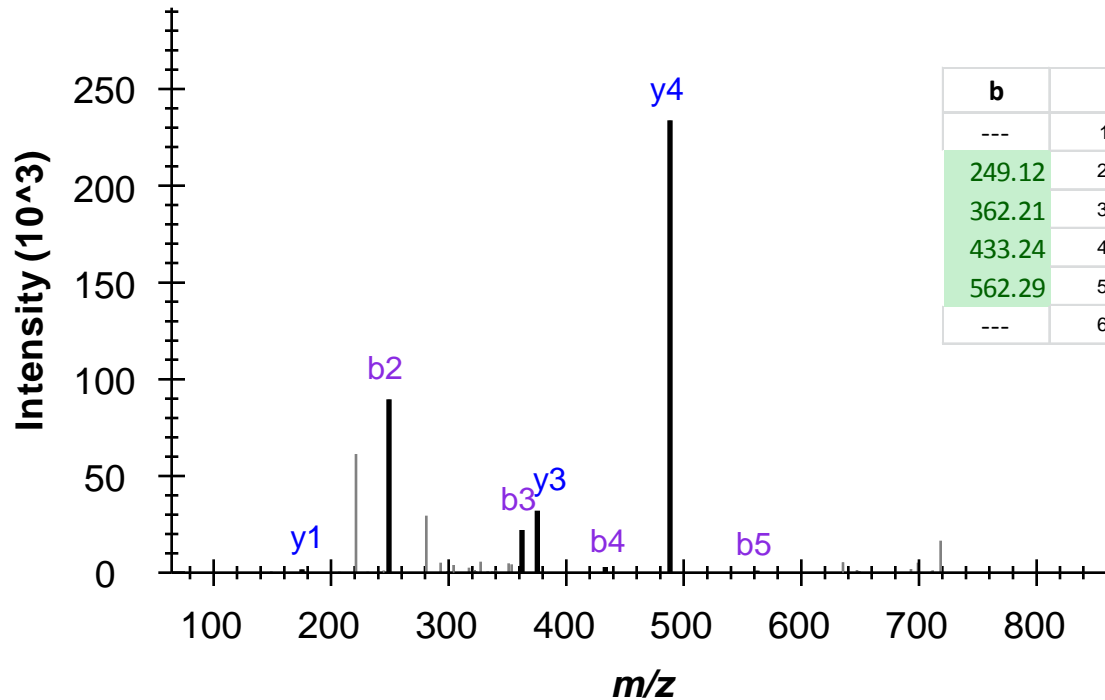

| b      |   |          |   | y      | y <sup>+2</sup> |
|--------|---|----------|---|--------|-----------------|
| ---    | 1 | <b>F</b> | 6 | ---    | ---             |
| 249.12 | 2 | <b>T</b> | 5 | 589.33 | 295.17          |
| 362.21 | 3 | <b>L</b> | 4 | 488.28 | 244.65          |
| 433.24 | 4 | <b>A</b> | 3 | 375.20 | 188.10          |
| 562.29 | 5 | <b>E</b> | 2 | 304.16 | 152.58          |
| ---    | 6 | <b>R</b> | 1 | 175.12 | 88.06           |



### DVU1018\_ETLSAGGDR

Experiment ID: L5930\_24\_326 ; Experiment Type: INSOL; Mass spectrometer: LTQ  
m/z: 453.23; TheorMW (Da): 904.4251; delta: 22.6 ppm; missed cleav: 0; mods: none;  
IonScore: 37.03; expect value: 3.04E-02

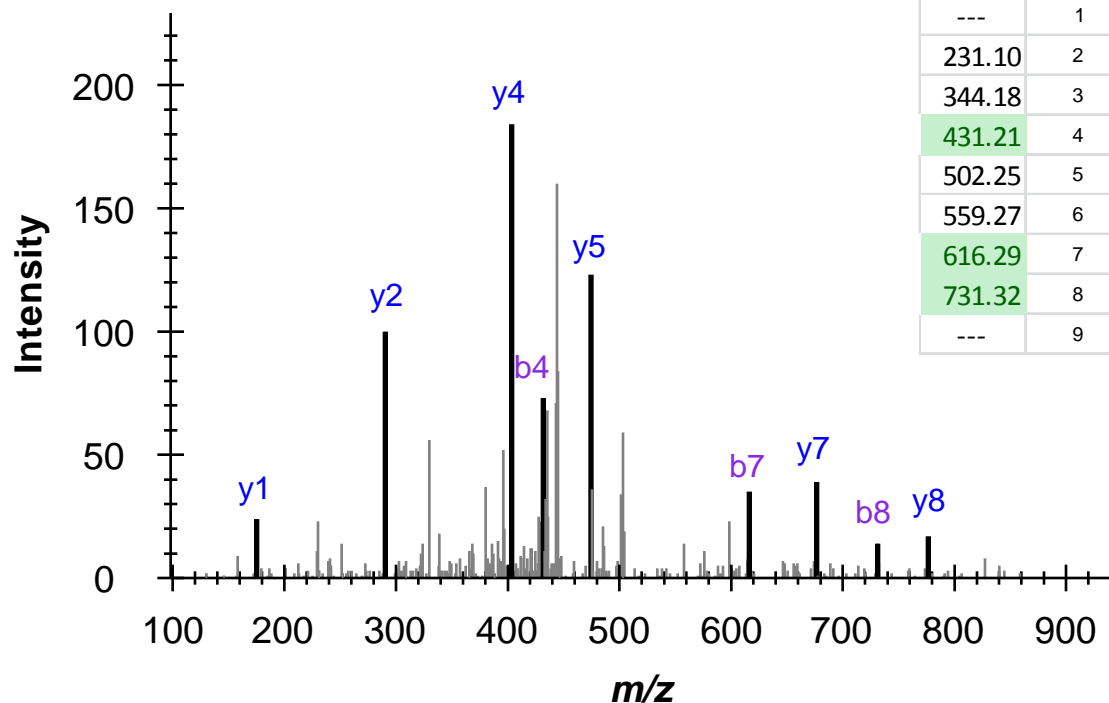

| <b>b</b> |   |          |   | <b>y</b> | <b>y<sup>+2</sup></b> |
|----------|---|----------|---|----------|-----------------------|
| ---      | 1 | <b>E</b> | 9 | ---      | ---                   |
| 231.10   | 2 | <b>T</b> | 8 | 776.39   | 388.70                |
| 344.18   | 3 | <b>L</b> | 7 | 675.34   | 338.17                |
| 431.21   | 4 | <b>S</b> | 6 | 562.26   | 281.63                |
| 502.25   | 5 | <b>A</b> | 5 | 475.23   | 238.12                |
| 559.27   | 6 | <b>G</b> | 4 | 404.19   | 202.60                |
| 616.29   | 7 | <b>G</b> | 3 | 347.17   | 174.09                |
| 731.32   | 8 | <b>D</b> | 2 | 290.15   | 145.58                |
| ---      | 9 | <b>R</b> | 1 | 175.12   | 88.06                 |

### DVU1049\_SLGILHR

Experiment ID: L24494\_78\_1388 ; Experiment Type: INSOL; Mass spectrometer: Orbitrap  
m/z: 398.245; TheorMW (Da): 794.477; delta: -1.1 ppm; missed cleav: 0; mods: none;  
IonScore: 18.44; expect value: 3.5E-02

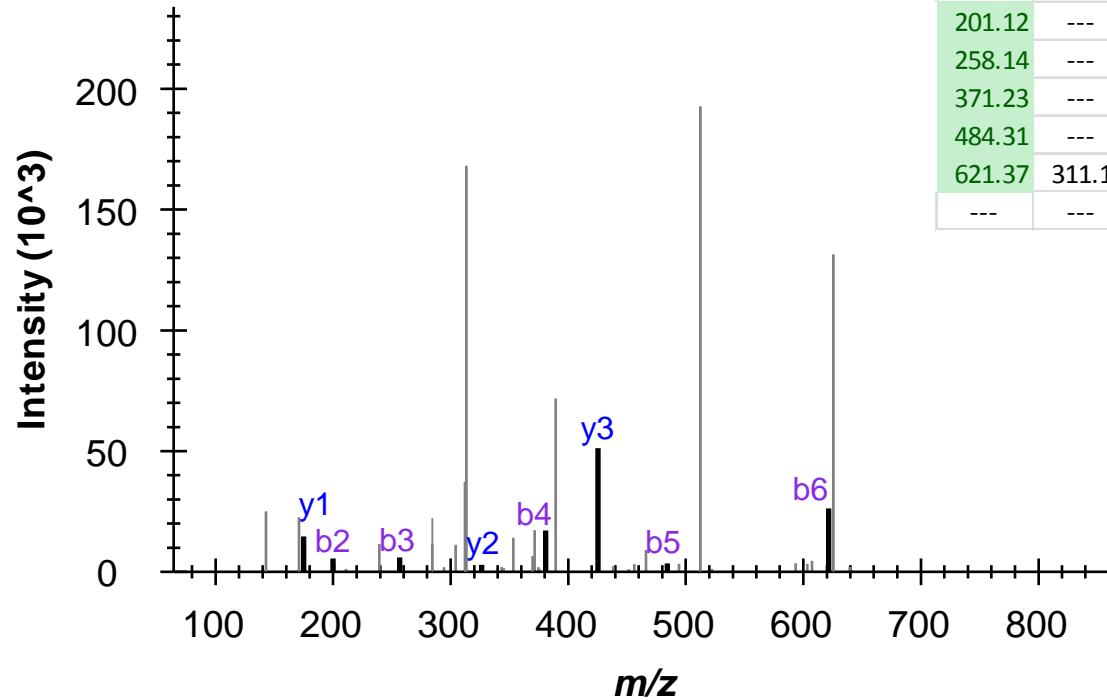

| b      | b <sup>+2</sup> |   |          |   | y      | y <sup>+2</sup> |
|--------|-----------------|---|----------|---|--------|-----------------|
| ---    | ---             | 1 | <b>S</b> | 7 | ---    | ---             |
| 201.12 | ---             | 2 | <b>L</b> | 6 | 708.45 | 354.73          |
| 258.14 | ---             | 3 | <b>G</b> | 5 | 595.37 | 298.19          |
| 371.23 | ---             | 4 | <b>I</b> | 4 | 538.35 | 269.68          |
| 484.31 | ---             | 5 | <b>L</b> | 3 | 425.26 | 213.13          |
| 621.37 | 311.19          | 6 | <b>H</b> | 2 | 312.18 | 156.59          |
| ---    | ---             | 7 | <b>R</b> | 1 | 175.12 | 88.06           |

### DVU1091\_AVRDGIHAVVR

Experiment ID: L21638\_69\_1233 ; Experiment Type: INSOL; Mass spectrometer: Orbitrap  
m/z: 563.838; TheorMW (Da): 1125.6619; delta: -0.3 ppm; missed cleav: 1; mods: none;  
IonScore: 16.69; expect value: 4.29E-02

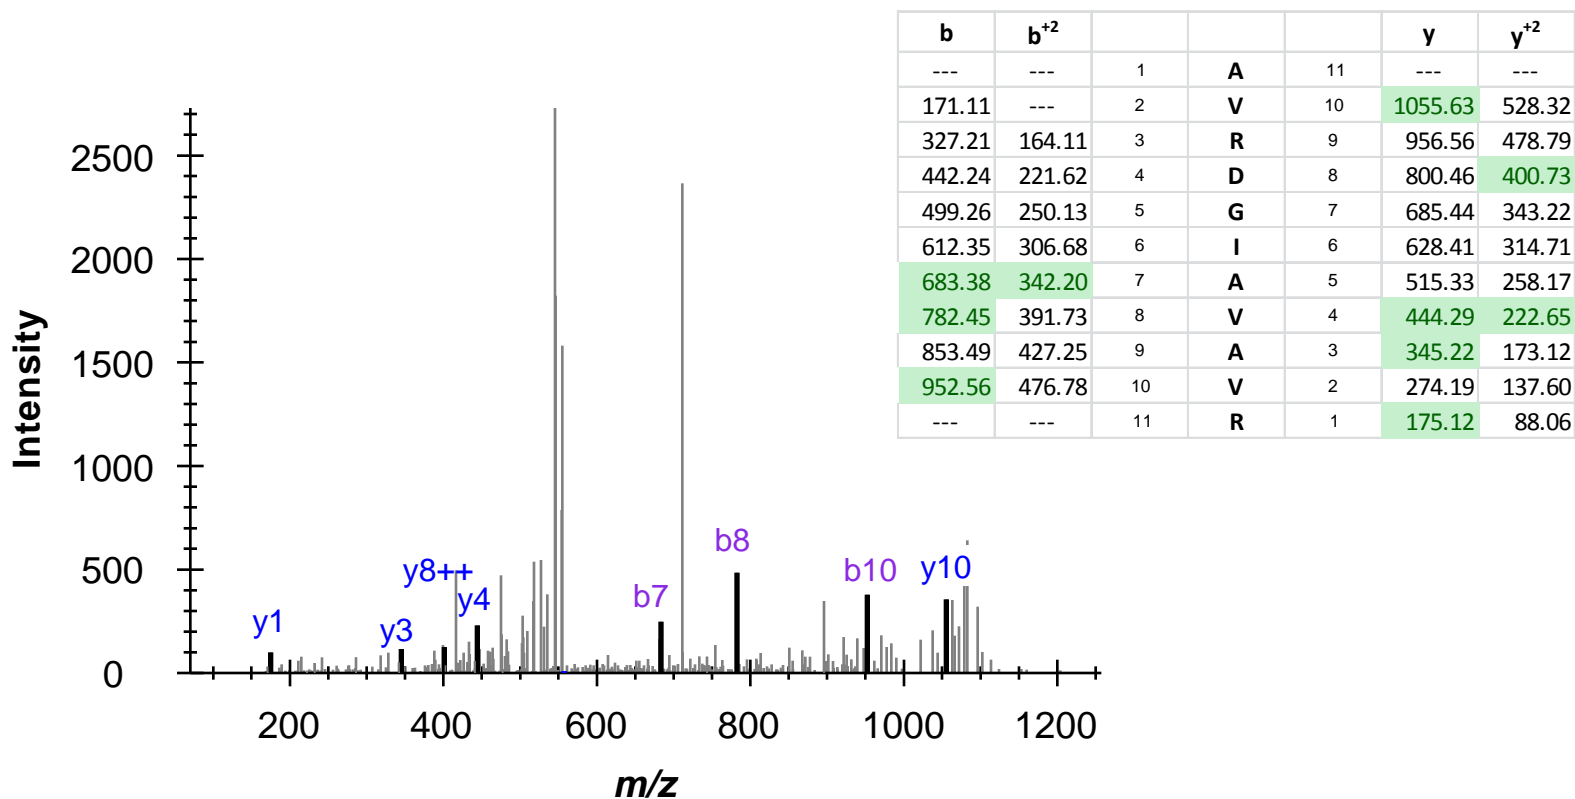

### DVU1116\_IDTLRR

Experiment ID: L22743\_73\_1308 ; Experiment Type: INSOL; Mass spectrometer: Orbitrap  
m/z: 387.235; TheorMW (Da): 772.456; delta: -0.1 ppm; missed cleav: 1; mods: none;  
IonScore: 26.88; expect value: 1.8E-02

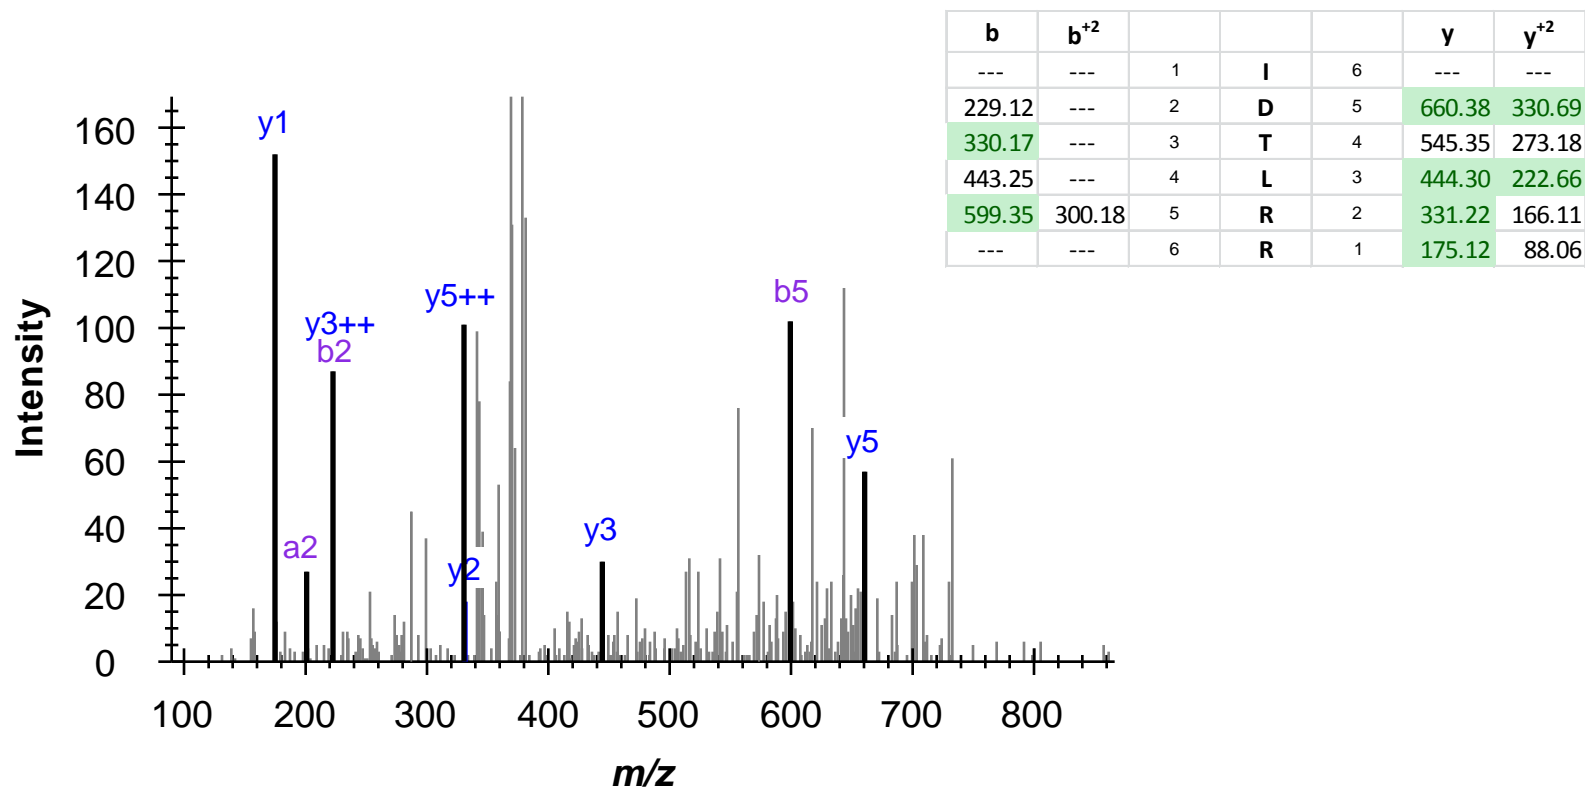

### DVU1123\_ALQEVQR

Experiment ID: L11132\_39\_1140 ; Experiment Type: INGEL; Mass spectrometer: LTQ  
m/z: 423.181; TheorMW (Da): 844.4291; delta: -96.6 ppm; missed cleav: 0; mods: 2 Deamidation (NQ);  
IonScore: 35.82; expect value: 3.69E-02

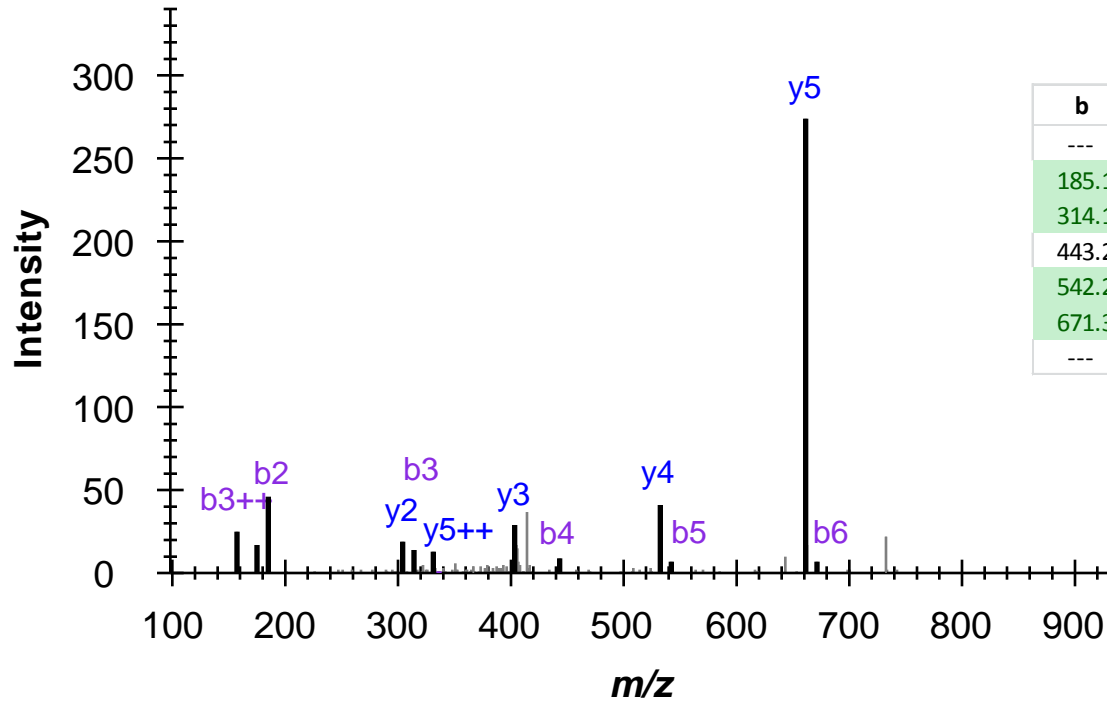

| b      |   |                |   | y      | y <sup>+2</sup> |
|--------|---|----------------|---|--------|-----------------|
| ---    | 1 | <b>A</b>       | 7 | ---    | ---             |
| 185.13 | 2 | <b>L</b>       | 6 | 774.40 | 387.70          |
| 314.17 | 3 | <b>Q-&gt;E</b> | 5 | 661.32 | 331.16          |
| 443.21 | 4 | <b>E</b>       | 4 | 532.27 | 266.64          |
| 542.28 | 5 | <b>V</b>       | 3 | 403.23 | 202.12          |
| 671.32 | 6 | <b>Q-&gt;E</b> | 2 | 304.16 | 152.58          |
| ---    | 7 | <b>R</b>       | 1 | 175.12 | 88.06           |

### DVU1138\_ILLEDPDK

Experiment ID: L8191\_29\_547; Experiment Type: INSOL; Mass spectrometer: Orbitrap  
m/z: 528.304; TheorMW (Da): 1054.59; delta: 2.3 ppm; missed cleav: 0; mods: none;  
IonScore: 22.7; expect value: 1.2E-02

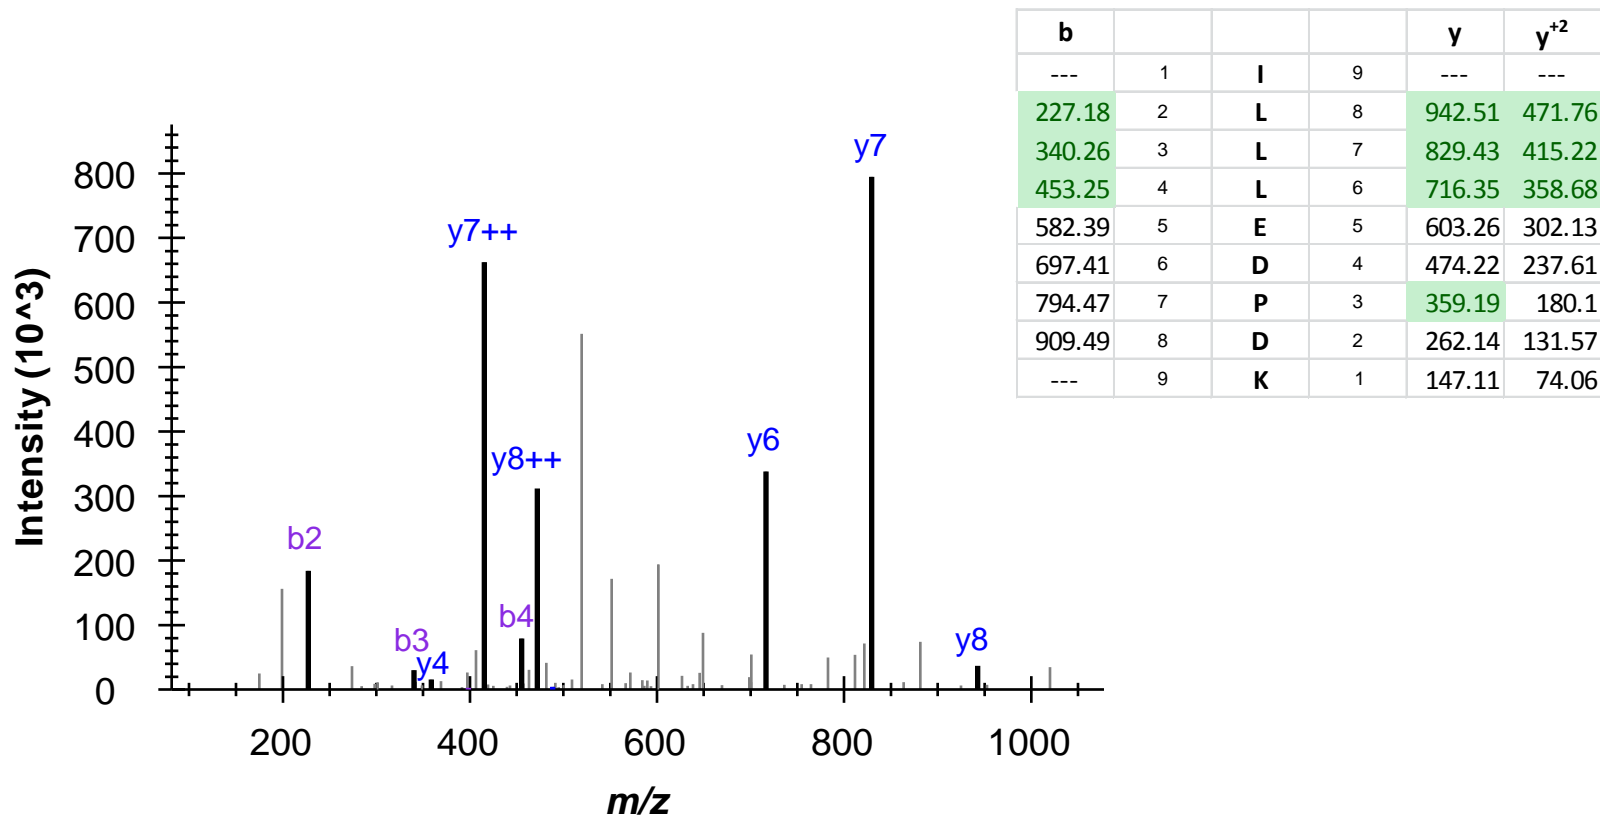

### DVU1283\_SMPVNIR

Experiment ID: L9483\_34\_636 ; Experiment Type: INSOL; Mass spectrometer: Orbitrap  
m/z: 409.216; TheorMW (Da): 816.4164; delta: 1.3 ppm; missed cleav: 0; mods: Deamidation (NQ);  
IonScore: 20.48; expect value: 3.89E-02

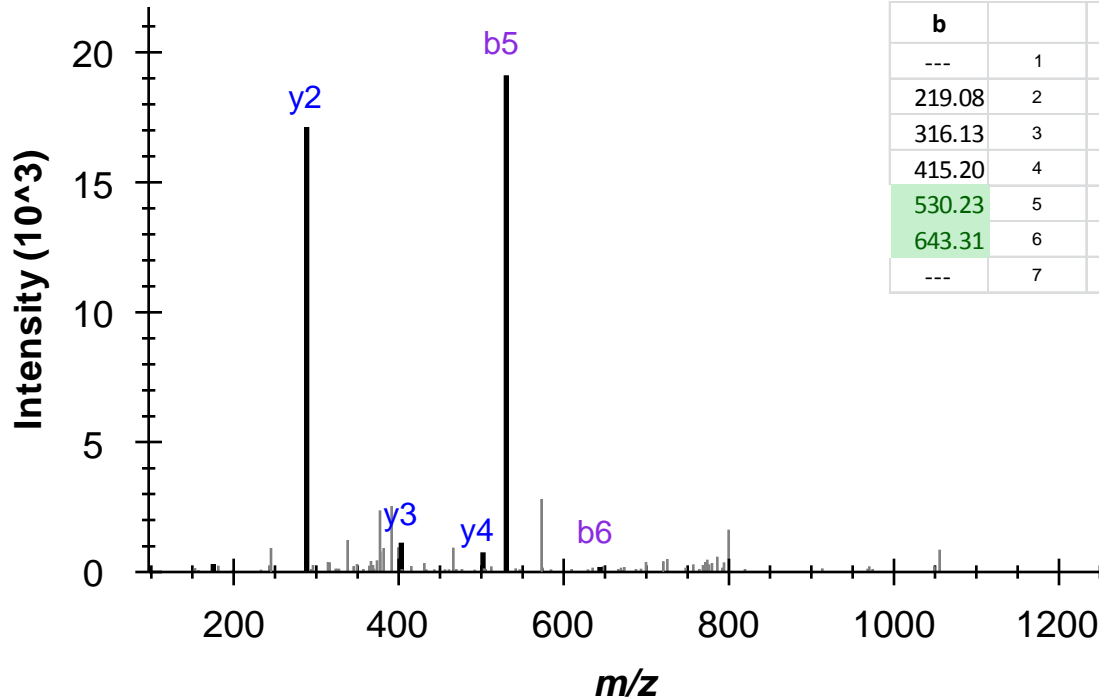

| b      |   |                |   | y      | y <sup>+2</sup> |
|--------|---|----------------|---|--------|-----------------|
| ---    | 1 | <b>S</b>       | 7 | ---    | ---             |
| 219.08 | 2 | <b>M</b>       | 6 | 730.39 | 365.70          |
| 316.13 | 3 | <b>P</b>       | 5 | 599.35 | 300.18          |
| 415.20 | 4 | <b>V</b>       | 4 | 502.30 | 251.65          |
| 530.23 | 5 | <b>N-&gt;D</b> | 3 | 403.23 | 202.12          |
| 643.31 | 6 | <b>I</b>       | 2 | 288.20 | 144.61          |
| ---    | 7 | <b>R</b>       | 1 | 175.12 | 88.06           |

### DVU1457\_QAERFGAVLR

Experiment ID: L15484\_49\_865 ; Experiment Type: INSOL; Mass spectrometer: Orbitrap  
m/z: 565.802; TheorMW (Da): 1129.588; delta: 1.3 ppm; missed cleav: 1; mods: [Q-16];  
IonScore: 26.76; expect value: 1.16E-02

| b      | b <sup>+</sup> |    |               |    | y       | y <sup>+</sup> |
|--------|----------------|----|---------------|----|---------|----------------|
| ---    | ---            | 1  | <b>Q(-16)</b> | 10 | ---     | ---            |
| 184.10 | ---            | 2  | <b>A</b>      | 9  | 1018.58 | 509.79         |
| 313.15 | ---            | 3  | <b>E</b>      | 8  | 947.54  | 474.27         |
| 469.25 | 235.13         | 4  | <b>R</b>      | 7  | 818.50  | 409.75         |
| 616.32 | 308.66         | 5  | <b>F</b>      | 6  | 662.40  | 331.70         |
| 673.34 | 337.17         | 6  | <b>G</b>      | 5  | 515.33  | 258.17         |
| 744.37 | 372.69         | 7  | <b>A</b>      | 4  | 458.31  | 229.66         |
| 843.44 | 422.22         | 8  | <b>V</b>      | 3  | 387.27  | 194.14         |
| 956.53 | 478.77         | 9  | <b>L</b>      | 2  | 288.20  | 144.61         |
| ---    | ---            | 10 | <b>R</b>      | 1  | 175.12  | 88.06          |

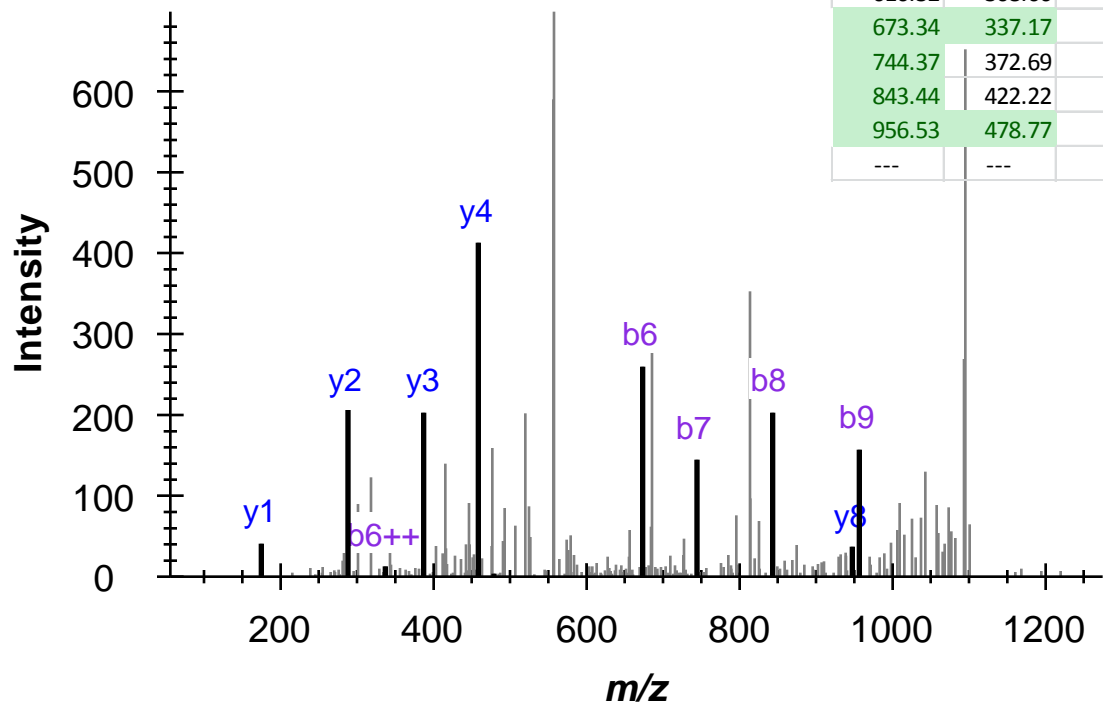



# DVU1606\_MAQSILR

Experiment ID: L10350\_36\_974 ; Experiment Type: INGEL; Mass spectrometer: LTQ  
m/z: 409.781; TheorMW (Da): 817.448; delta: 121.7 ppm; missed cleav: 0; mods: none;  
IonScore: 35.08; expect value: 4.86E-02

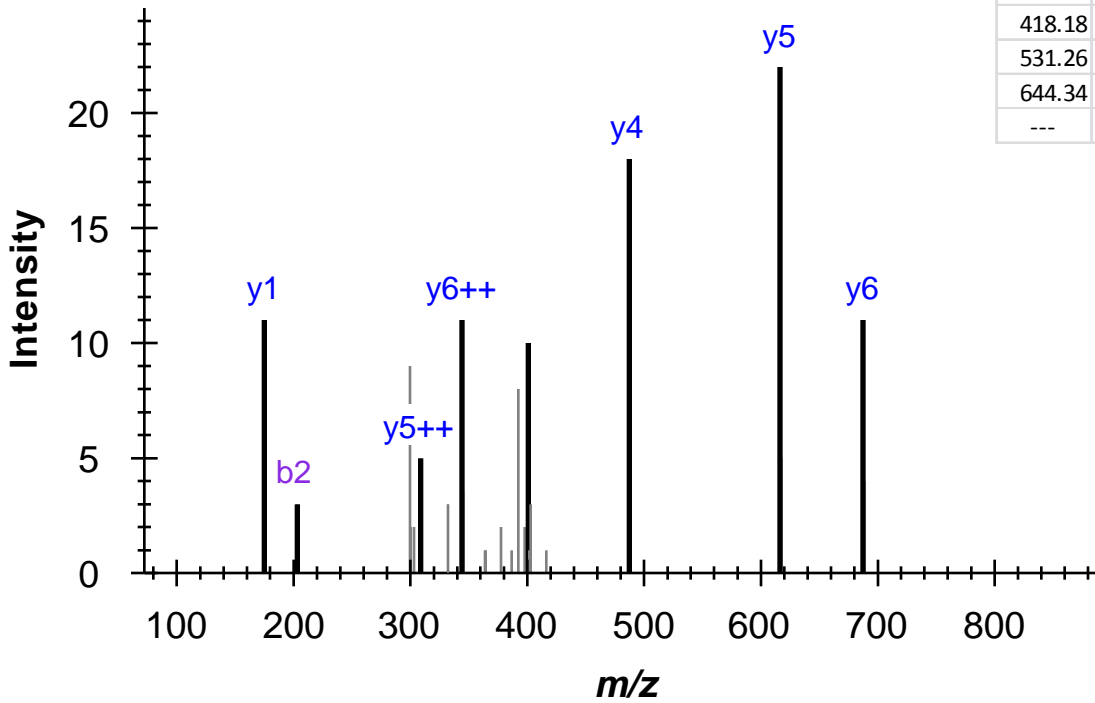

| b      |   |          |   | y      | y <sup>+2</sup> |
|--------|---|----------|---|--------|-----------------|
| ---    | 1 | <b>M</b> | 7 | ---    | ---             |
| 203.08 | 2 | <b>A</b> | 6 | 687.41 | 344.21          |
| 331.14 | 3 | <b>Q</b> | 5 | 616.38 | 308.69          |
| 418.18 | 4 | <b>S</b> | 4 | 488.32 | 244.66          |
| 531.26 | 5 | <b>I</b> | 3 | 401.29 | 201.15          |
| 644.34 | 6 | <b>L</b> | 2 | 288.20 | 144.61          |
| ---    | 7 | <b>R</b> | 1 | 175.12 | 88.06           |

### DVU1619\_RLLPSR

Experiment ID: L11625\_40\_761 ; Experiment Type: INSOL; Mass spectrometer: Orbitrap  
m/z: 419.77; TheorMW (Da): 837.52; delta: 0 ppm; missed cleav: 1; mods: none;  
IonScore: 19.8; expect value: 2.10E-02

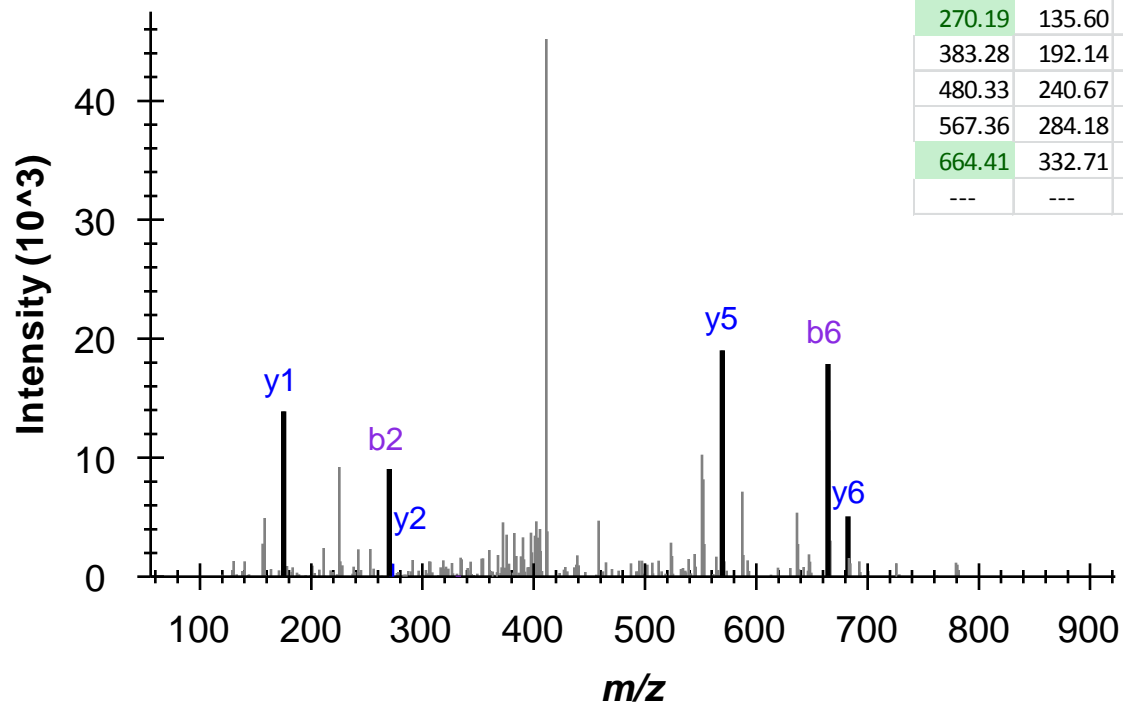

| b      | b <sup>+2</sup> |   |          |   | y      | y <sup>+2</sup> |
|--------|-----------------|---|----------|---|--------|-----------------|
| ---    | ---             | 1 | <b>R</b> | 7 | ---    | ---             |
| 270.19 | 135.60          | 2 | <b>L</b> | 6 | 682.42 | 341.72          |
| 383.28 | 192.14          | 3 | <b>L</b> | 5 | 569.34 | 285.17          |
| 480.33 | 240.67          | 4 | <b>P</b> | 4 | 456.26 | 228.63          |
| 567.36 | 284.18          | 5 | <b>S</b> | 3 | 359.20 | 180.11          |
| 664.41 | 332.71          | 6 | <b>P</b> | 2 | 272.17 | 136.59          |
| ---    | ---             | 7 | <b>R</b> | 1 | 175.12 | 88.06           |

### DVU1771\_TLSALLPR

Experiment ID: L22998\_71\_1269 ; Experiment Type: INSOL; Mass spectrometer: Orbitrap  
m/z: 435.774; TheorMW (Da): 869.534; delta: 0.1 ppm; missed cleav: 0; mods: none;  
IonScore: 17.46; expect value: 3.8E-02

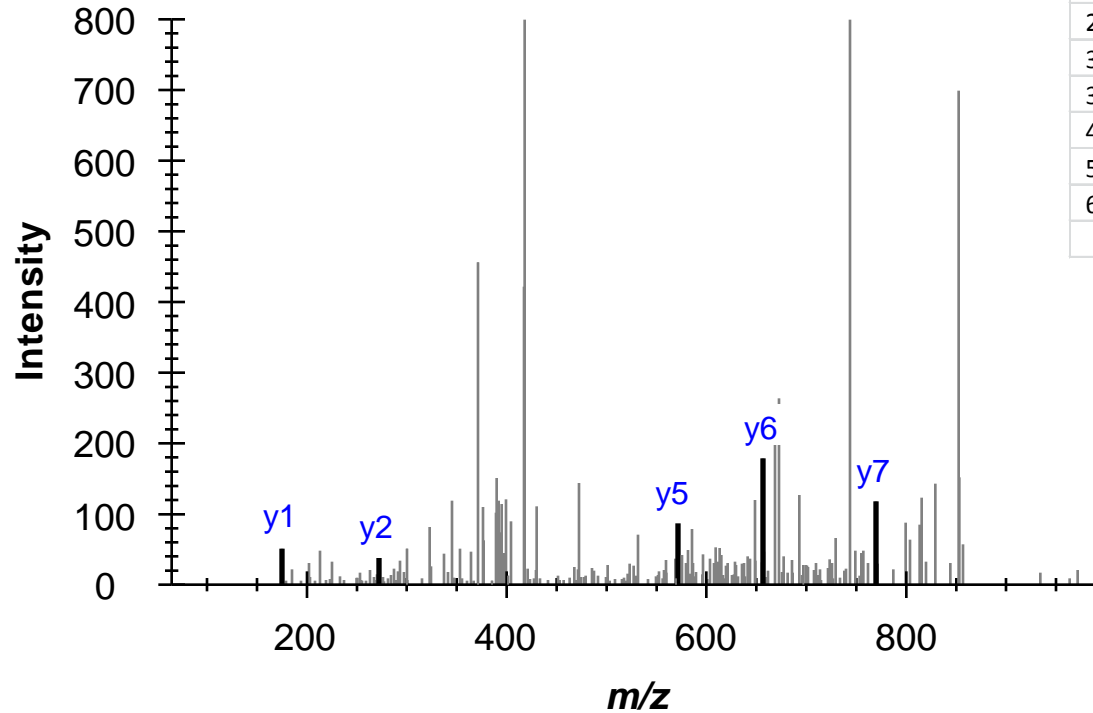

| b      |   |          |   | y      | y <sup>+2</sup> |
|--------|---|----------|---|--------|-----------------|
| ---    | 1 | <b>T</b> | 8 | ---    | ---             |
| 215.14 | 2 | <b>L</b> | 7 | 769.49 | 385.25          |
| 302.17 | 3 | <b>S</b> | 6 | 656.41 | 328.71          |
| 373.21 | 4 | <b>A</b> | 5 | 569.38 | 285.19          |
| 486.29 | 5 | <b>L</b> | 4 | 498.34 | 249.67          |
| 599.38 | 6 | <b>L</b> | 3 | 385.26 | 193.13          |
| 696.43 | 7 | <b>P</b> | 2 | 272.17 | 136.59          |
| ---    | 8 | <b>R</b> | 1 | 175.12 | 88.063          |

### DVU1818\_I RETLR

Experiment ID: L8939\_32\_602 ; Experiment Type: INSOL; Mass spectrometer: Orbitrap  
m/z: 394.243; TheorMW (Da): 786.4712; delta: 0.4 ppm; missed cleav: 1; mods: none;  
IonScore: 16.55; expect value: 4.98E-02

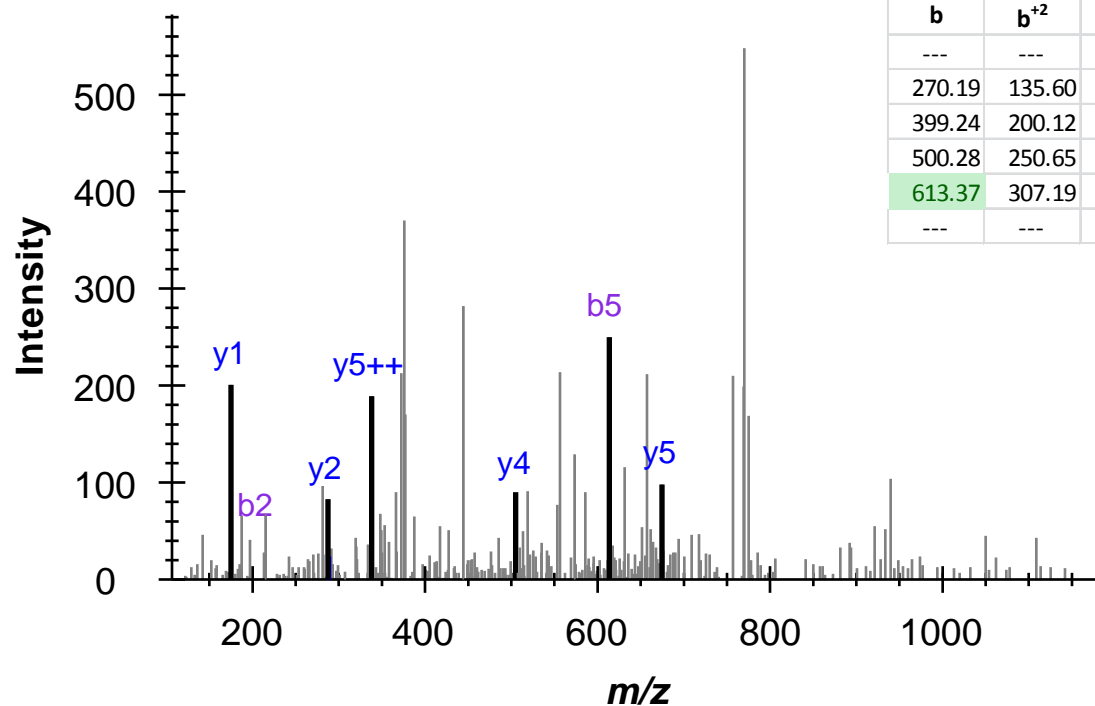

| b      | b <sup>+2</sup> |   |          |   | y      | y <sup>+2</sup> |
|--------|-----------------|---|----------|---|--------|-----------------|
| ---    | ---             | 1 | <b>I</b> | 6 | ---    | ---             |
| 270.19 | 135.60          | 2 | <b>R</b> | 5 | 674.39 | 337.70          |
| 399.24 | 200.12          | 3 | <b>E</b> | 4 | 518.29 | 259.65          |
| 500.28 | 250.65          | 4 | <b>T</b> | 3 | 389.25 | 195.13          |
| 613.37 | 307.19          | 5 | <b>L</b> | 2 | 288.20 | 144.61          |
| ---    | ---             | 6 | <b>R</b> | 1 | 175.12 | 88.06           |

### DVU1955\_QCGNARSMLGGR

Experiment ID: L10911\_38\_1093 ; Experiment Type: INGEL; Mass spectrometer: LTQ  
 m/z: 654.322; TheorMW (Da): 1306.5871; delta: 32.5 ppm; missed cleav: 1; mods: [Q-16], Deamidation (NQ);  
 IonScore: 38.15; expect value: 1.58E-02

| b       | b <sup>+2</sup> |    |                    | y  | y <sup>+2</sup> |
|---------|-----------------|----|--------------------|----|-----------------|
| ---     | ---             | 1  | Q(-16)             | 12 | ---             |
| 273.097 | ---             | 2  | C(Carbamidomethyl) | 11 | 1195.53 598.269 |
| 330.118 | ---             | 3  | G                  | 10 | 1035.5 518.254  |
| 445.145 | ---             | 4  | N->D               | 9  | 978.479 489.743 |
| 516.182 | ---             | 5  | A                  | 8  | 863.452 432.229 |
| 672.283 | 336.645         | 6  | R                  | 7  | 792.415 396.711 |
| 759.315 | 380.161         | 7  | S                  | 6  | 636.313 318.66  |
| 906.351 | 453.679         | 8  | m                  | 5  | 549.281 275.144 |
| 1019.43 | 510.221         | 9  | L                  | 4  | 402.246 201.627 |
| 1076.46 | 538.732         | 10 | G                  | 3  | 289.162 145.085 |
| 1133.48 | 567.242         | 11 | G                  | 2  | 232.14 116.574  |
| ---     | ---             | 12 | R                  | 1  | 175.119 88.0631 |

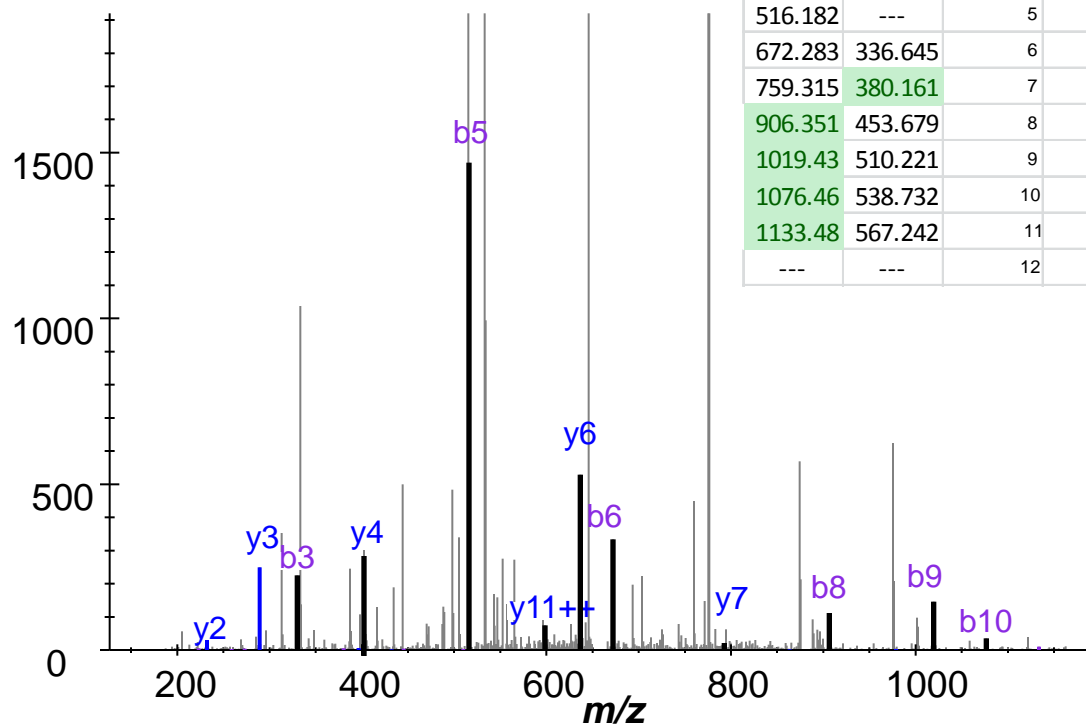

### DVU1959\_EEASILLR

Experiment ID: L8344\_30\_564 ; Experiment Type: INSOL; Mass spectrometer: Orbitrap  
m/z: 465.77; TheorMW (Da): 929.52; delta: 0 ppm; missed cleav: 0; mods: none;  
IonScore: 22.31; expect value: 4.1E-02

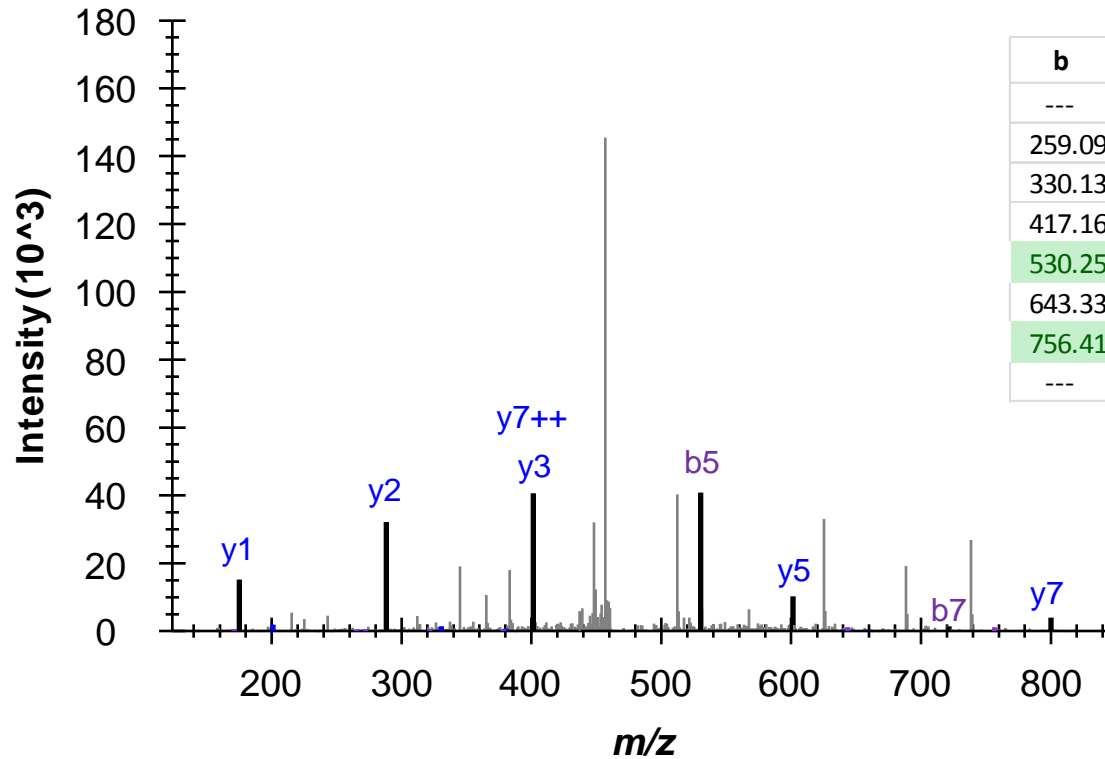

| b      |   |          |   | y      | y <sup>+2</sup> |
|--------|---|----------|---|--------|-----------------|
| ---    | 1 | <b>E</b> | 8 | ---    | ---             |
| 259.09 | 2 | <b>E</b> | 7 | 801.48 | 401.25          |
| 330.13 | 3 | <b>A</b> | 6 | 672.44 | 336.72          |
| 417.16 | 4 | <b>S</b> | 5 | 601.40 | 301.21          |
| 530.25 | 5 | <b>I</b> | 4 | 514.37 | 257.69          |
| 643.33 | 6 | <b>L</b> | 3 | 401.29 | 201.15          |
| 756.41 | 7 | <b>L</b> | 2 | 288.20 | 144.61          |
| ---    | 8 | <b>R</b> | 1 | 175.12 | 88.06           |

### DVU2099\_QVLALNR

Experiment ID: L18884\_61\_1089 ; Experiment Type: INSOL; Mass spectrometer: Orbitrap  
m/z: 407.743; TheorMW (Da): 813.471; delta: 0.8 ppm; missed cleav: 0; mods: Deamidation (NQ);  
IonScore: 21.72; expect value: 4.6E-02

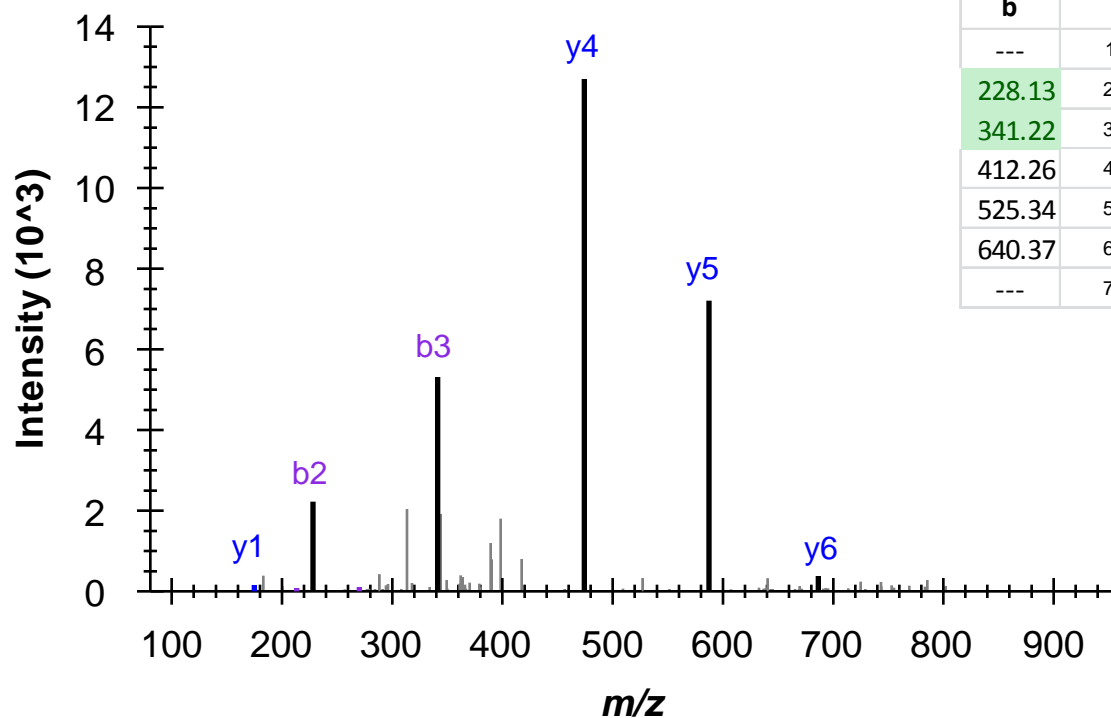

| b      |   |                |   | y      | y <sup>+2</sup> |
|--------|---|----------------|---|--------|-----------------|
| ---    | 1 | <b>Q</b>       | 7 | ---    | ---             |
| 228.13 | 2 | <b>V</b>       | 6 | 686.42 | 343.71          |
| 341.22 | 3 | <b>L</b>       | 5 | 587.35 | 294.18          |
| 412.26 | 4 | <b>A</b>       | 4 | 474.27 | 237.64          |
| 525.34 | 5 | <b>L</b>       | 3 | 403.23 | 202.12          |
| 640.37 | 6 | <b>N-&gt;D</b> | 2 | 290.15 | 145.58          |
| ---    | 7 | <b>R</b>       | 1 | 175.12 | 88.06           |

### DVU2114\_NLILDALR

Experiment ID: L16079\_51\_908 ; Experiment Type: INSOL; Mass spectrometer: Orbitrap  
m/z: 464.285; TheorMW (Da): 926.5549; delta: 0.6 ppm; missed cleav: 0; mods: none;  
IonScore: 17.32; expect value: 4.82E-02

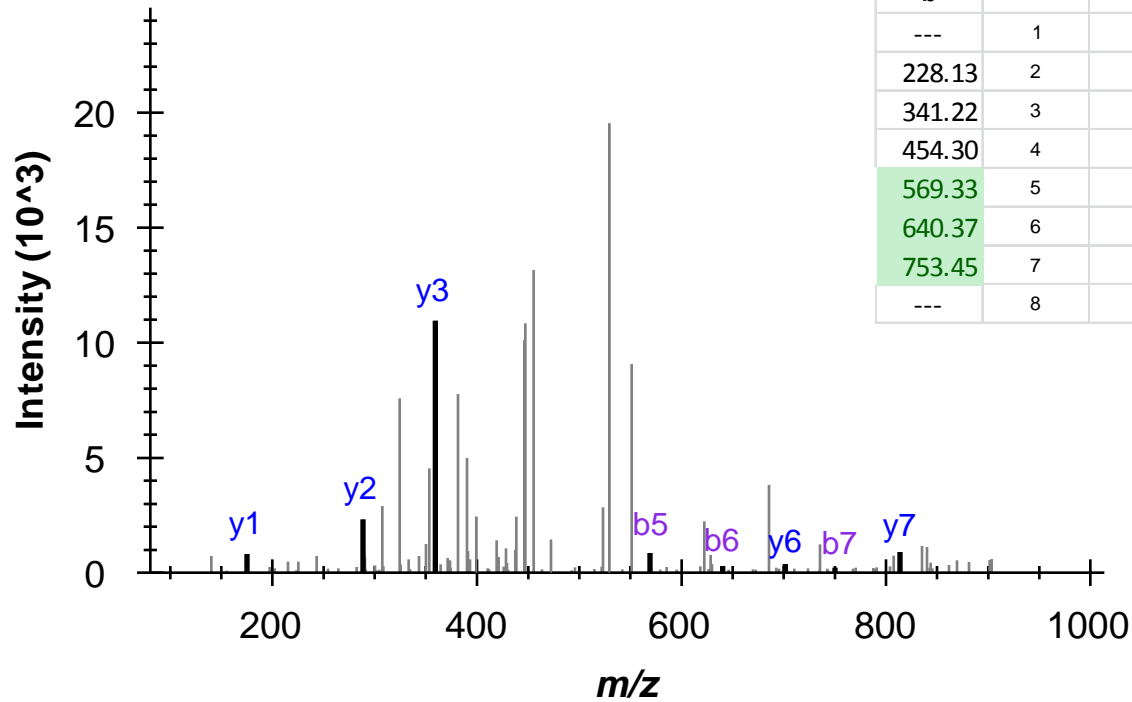

| b      |   |          |   | y      | $y^{+2}$ |
|--------|---|----------|---|--------|----------|
| ---    | 1 | <b>N</b> | 8 | ---    | ---      |
| 228.13 | 2 | <b>L</b> | 7 | 813.52 | 407.26   |
| 341.22 | 3 | <b>I</b> | 6 | 700.44 | 350.72   |
| 454.30 | 4 | <b>L</b> | 5 | 587.35 | 294.18   |
| 569.33 | 5 | <b>D</b> | 4 | 474.27 | 237.64   |
| 640.37 | 6 | <b>A</b> | 3 | 359.24 | 180.12   |
| 753.45 | 7 | <b>L</b> | 2 | 288.20 | 144.61   |
| ---    | 8 | <b>R</b> | 1 | 175.12 | 88.06    |



### DVU2121\_GETVLMDMR

Experiment ID: L13325\_46\_107 ; Experiment Type: INSOL; Mass spectrometer: LTQ  
m/z: 534.3; TheorMW (Da): 1066.479; delta: 100.1 ppm; missed cleav: 0; mods: Oxidation (M);  
IonScore: 36.85; expect value: 2.2E-02

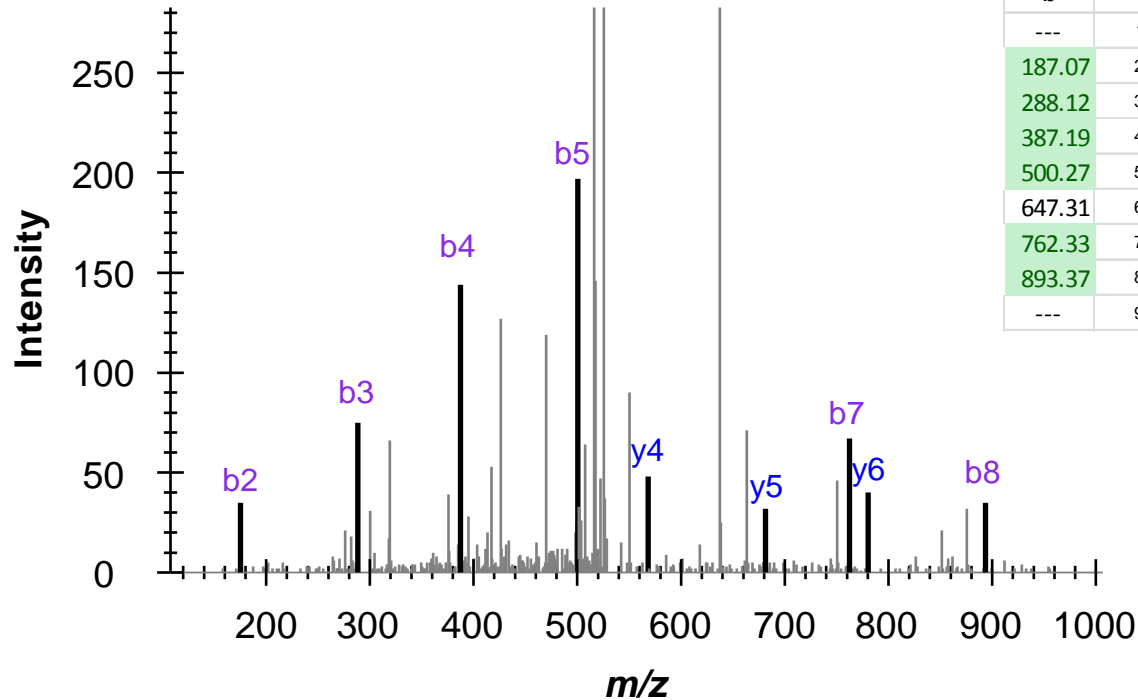

| b      |   |          |   | y      | y <sup>+2</sup> |
|--------|---|----------|---|--------|-----------------|
| ---    | 1 | <b>G</b> | 9 | ---    | ---             |
| 187.07 | 2 | <b>E</b> | 8 | 1010.5 | 505.74          |
| 288.12 | 3 | <b>T</b> | 7 | 881.42 | 441.21          |
| 387.19 | 4 | <b>V</b> | 6 | 780.37 | 390.69          |
| 500.27 | 5 | <b>L</b> | 5 | 681.31 | 341.16          |
| 647.31 | 6 | <b>m</b> | 4 | 568.22 | 284.61          |
| 762.33 | 7 | <b>D</b> | 3 | 421.19 | 211.10          |
| 893.37 | 8 | <b>M</b> | 2 | 306.16 | 153.58          |
| ---    | 9 | <b>R</b> | 1 | 175.12 | 88.06           |

### DVU2143\_LETITK

Experiment ID: L22845\_71\_1260 ; Experiment Type: INSOL; Mass spectrometer: Orbitrap  
m/z: 704.418; TheorMW (Da): 703.4116; delta: -1.2 ppm; missed cleav: 0; mods: none;  
IonScore: 14.89; expect value: 3.24E-02

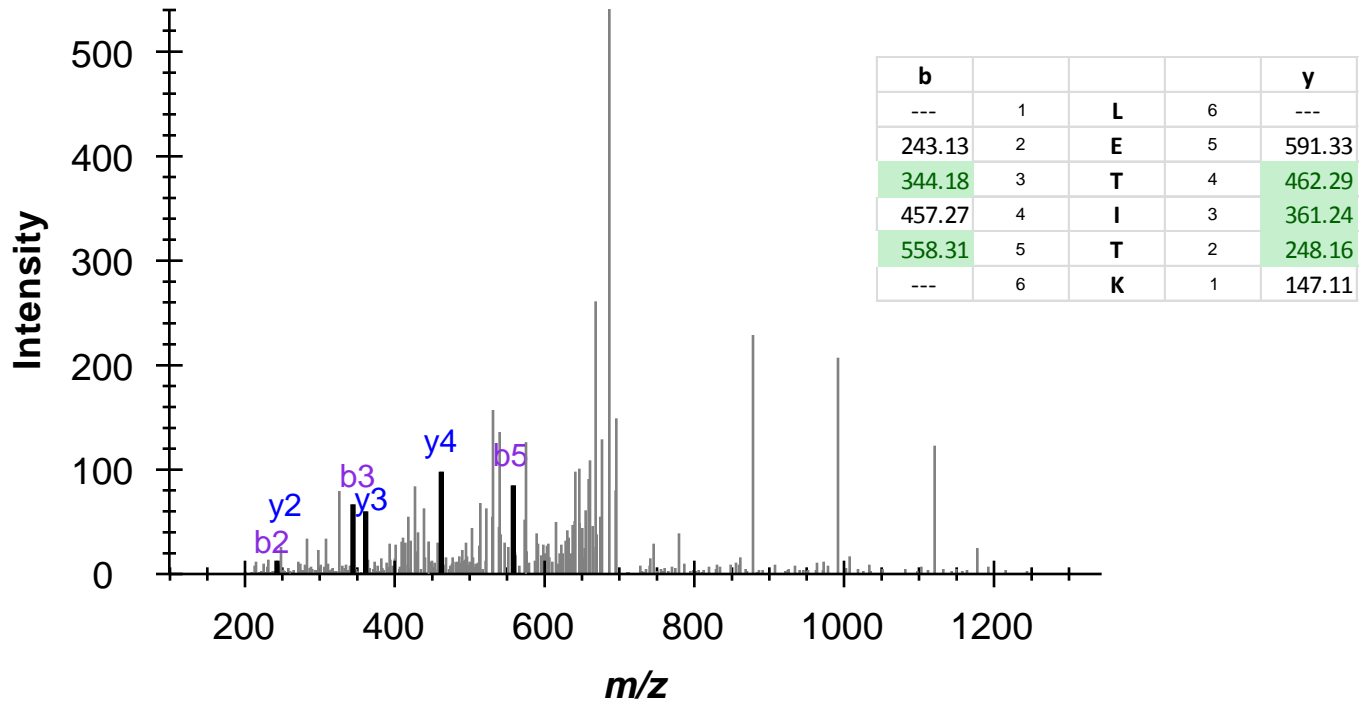

### DVU2385\_FGDSLFKGR

Experiment ID: L4349\_17\_72 ; Experiment Type: INSOL; Mass spectrometer: LTQ  
m/z: 513.55; TheorMW (Da): 1025.53; delta: -433 ppm; missed cleav: 1; mods: none;  
IonScore: 39.01; expect value: 2.8E-02

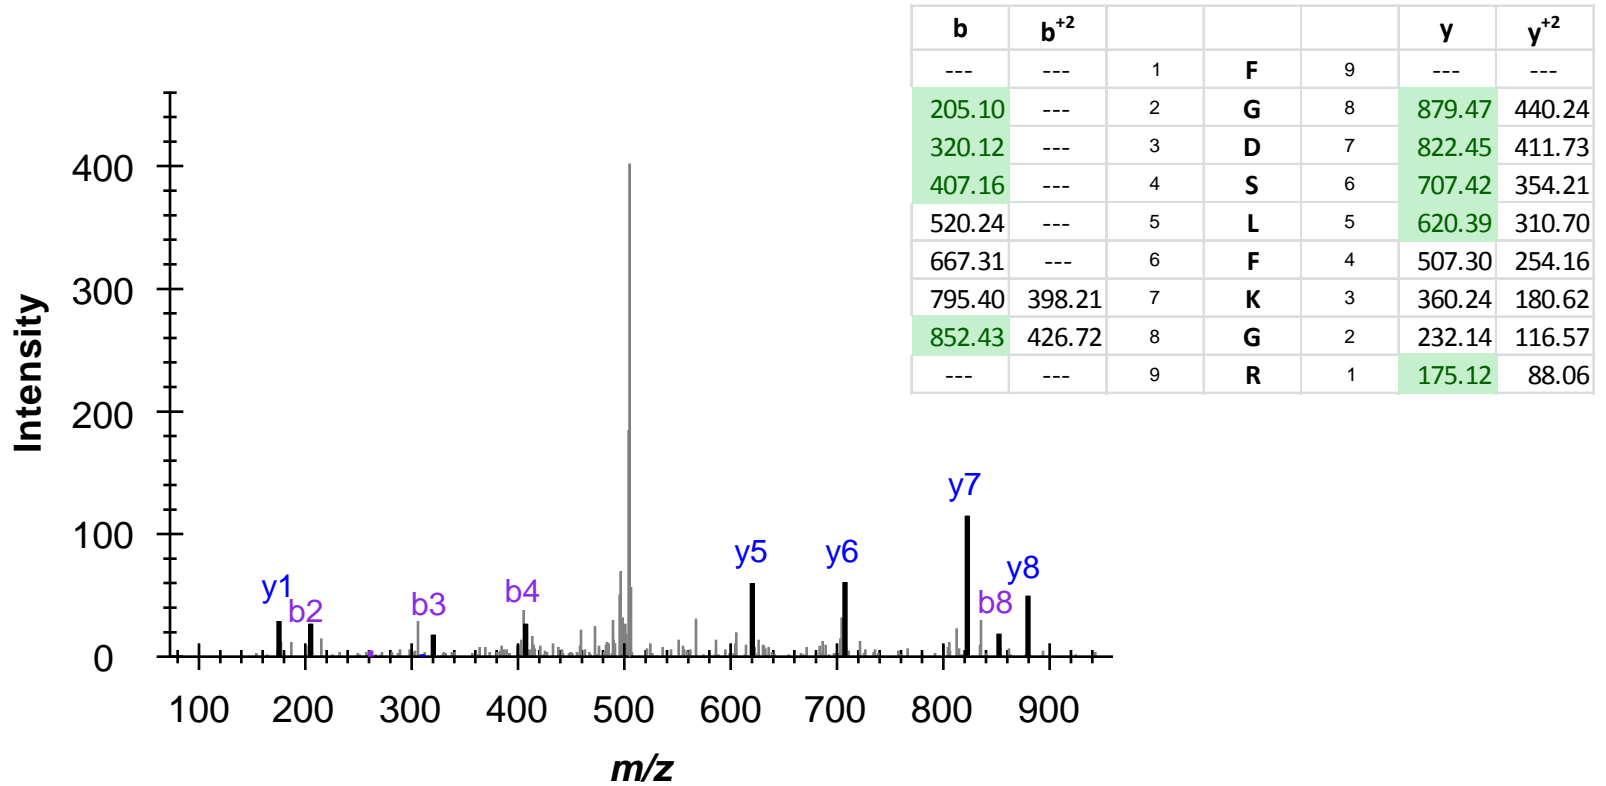

### DVU2409\_GNMDTGGGQVKNCFR

Experiment ID: L19241\_64\_1153 ; Experiment Type: INSOL; Mass spectrometer: Orbitrap  
 m/z: 830.341; TheorMW (Da): 1658.6665; delta: 0.6 ppm; missed cleav: 1; mods: 3 Deamidation (NQ); Oxidation (M);  
 IonScore: 16.87; expect value: 2.06E-02

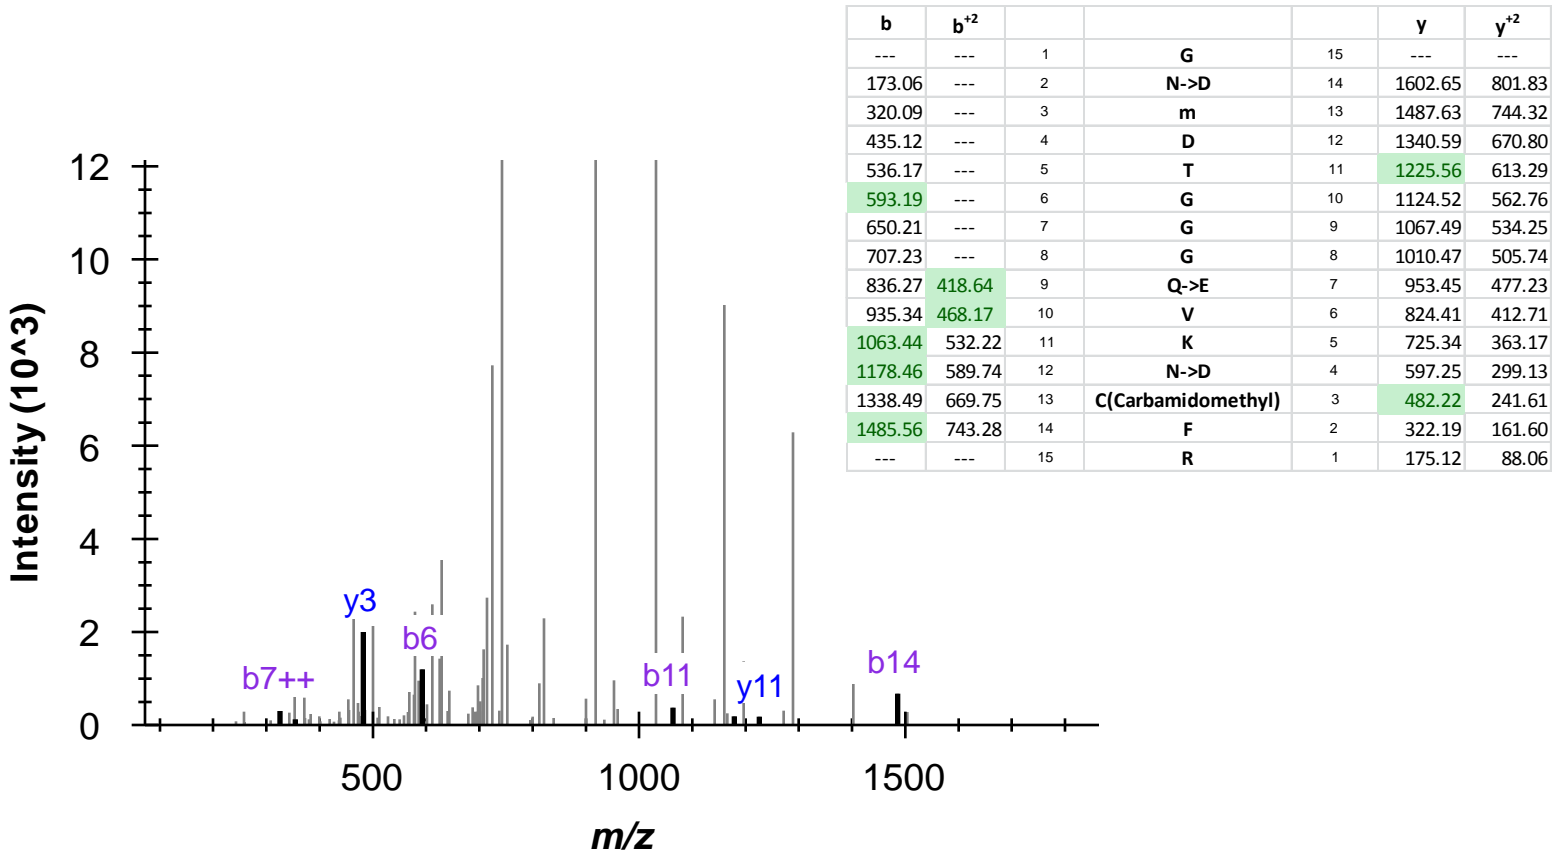

# DVU2510\_KGAPQDIR

Experiment ID: L19564\_60\_1073 ; Experiment Type: INSOL; Mass spectrometer: Orbitrap  
m/z: 442.751; TheorMW (Da): 883.4876; delta: -0.1 ppm; missed cleav: 1; mods: none;  
IonScore: 20.41; expect value: 4.14E-02

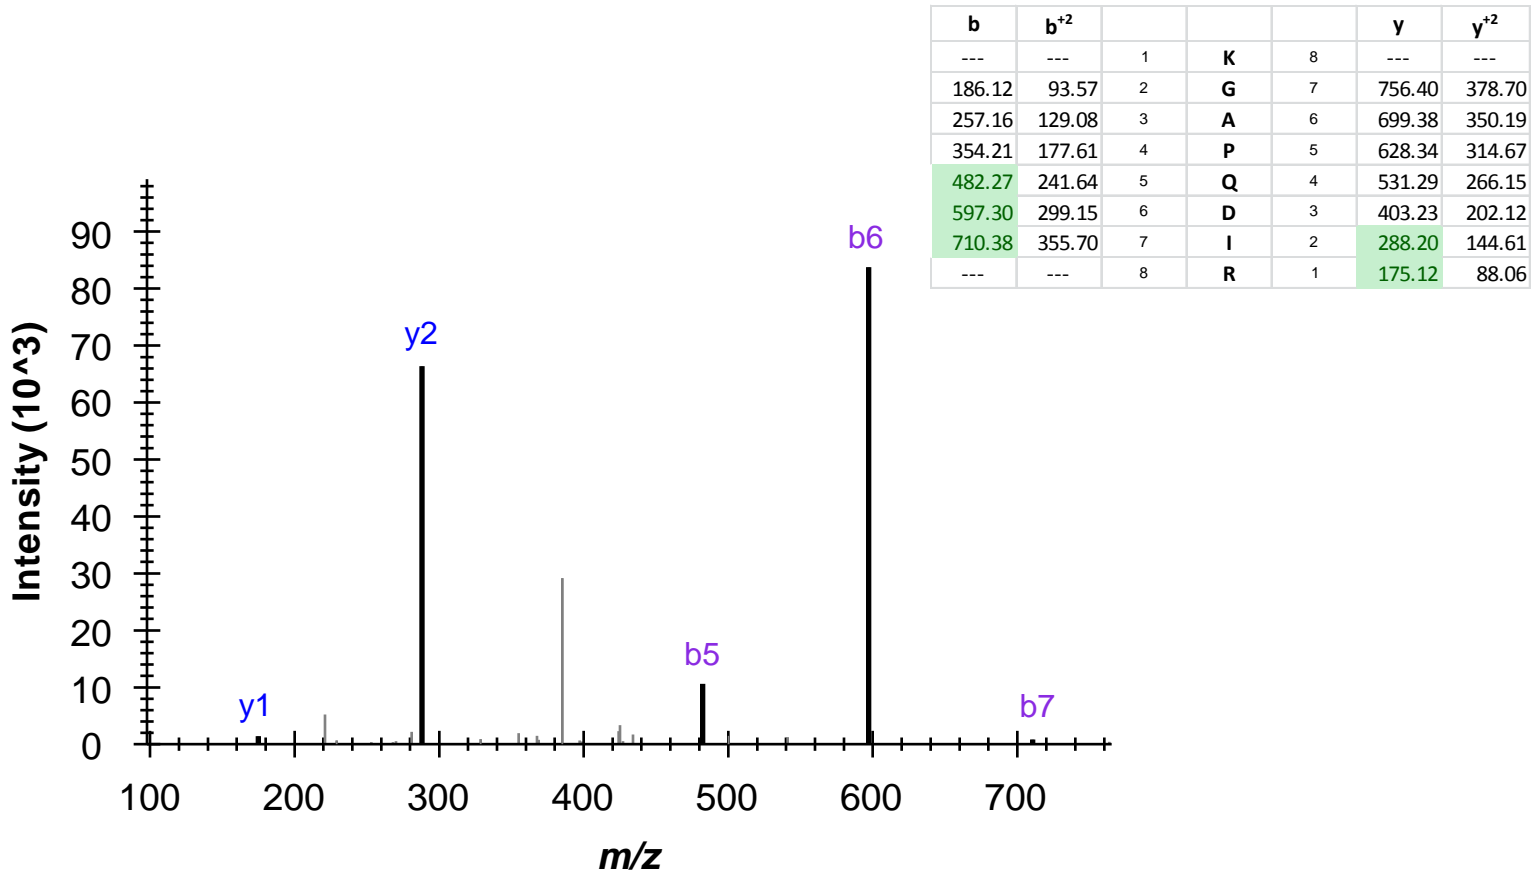

# DVU2552\_QVAPAVRVAVVGAMGGPGLPDMMLLGR

Experiment ID: L21587\_69\_1230 ; Experiment Type: INSOL; Mass spectrometer: Orbitrap  
m/z: 917.147; TheorMW (Da): 2748.4126; delta: 2.4 ppm; missed cleav: 1; mods: [Q-16];  
IonScore: 17.27; expect value:2.44E-02

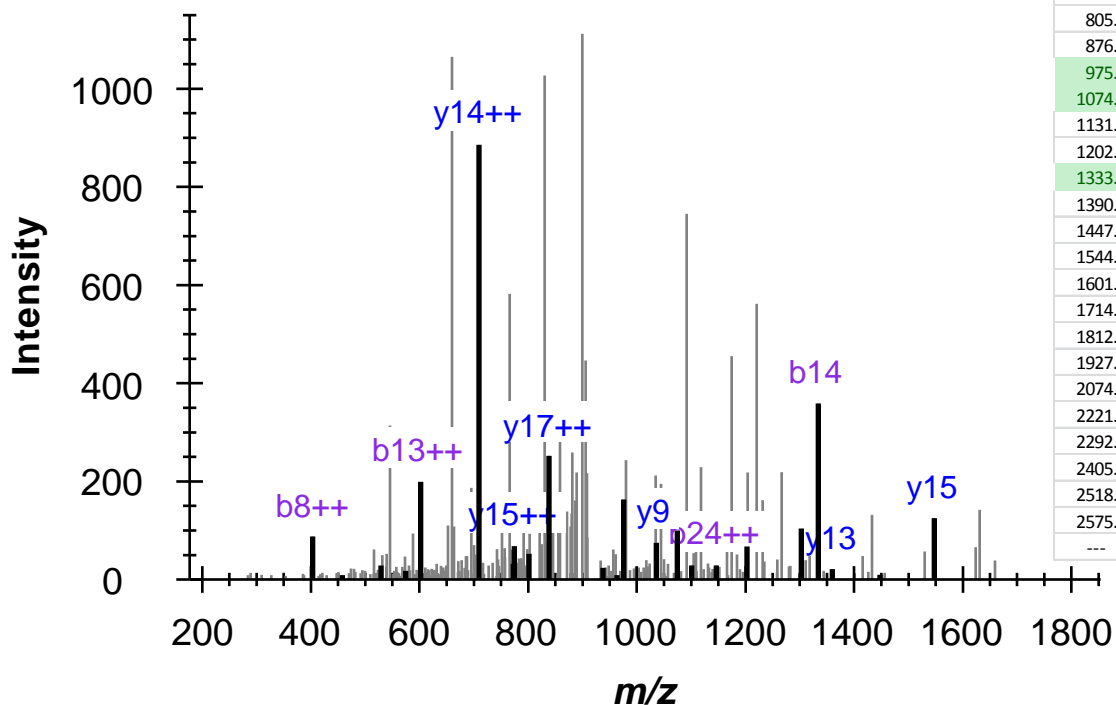

| b       | b <sup>+</sup> |    |        |    | y       | y <sup>+</sup> |
|---------|----------------|----|--------|----|---------|----------------|
| ---     | ---            | 1  | Q(-16) | 28 | ---     | ---            |
| 212.13  | ---            | 2  | V      | 27 | 2637.40 | 1319.21        |
| 283.17  | ---            | 3  | A      | 26 | 2538.34 | 1269.67        |
| 380.22  | ---            | 4  | P      | 25 | 2467.30 | 1234.15        |
| 451.26  | ---            | 5  | A      | 24 | 2370.25 | 1185.63        |
| 550.33  | ---            | 6  | V      | 23 | 2299.21 | 1150.11        |
| 706.43  | 353.72         | 7  | R      | 22 | 2200.14 | 1100.57        |
| 805.50  | 403.25         | 8  | V      | 21 | 2044.04 | 1022.52        |
| 876.54  | 438.77         | 9  | A      | 20 | 1944.97 | 972.99         |
| 975.60  | 488.31         | 10 | V      | 19 | 1873.93 | 937.47         |
| 1074.67 | 537.84         | 11 | V      | 18 | 1774.86 | 887.94         |
| 1131.69 | 566.35         | 12 | G      | 17 | 1675.80 | 838.40         |
| 1202.73 | 601.87         | 13 | A      | 16 | 1618.78 | 809.89         |
| 1333.77 | 667.39         | 14 | M      | 15 | 1547.74 | 774.37         |
| 1390.79 | 695.90         | 15 | G      | 14 | 1416.70 | 708.85         |
| 1447.82 | 724.41         | 16 | G      | 13 | 1359.68 | 680.34         |
| 1544.87 | 772.94         | 17 | P      | 12 | 1302.65 | 651.83         |
| 1601.89 | 801.45         | 18 | G      | 11 | 1205.60 | 603.30         |
| 1714.97 | 857.99         | 19 | L      | 10 | 1148.58 | 574.79         |
| 1812.03 | 906.52         | 20 | P      | 9  | 1035.50 | 518.25         |
| 1927.05 | 964.03         | 21 | D      | 8  | 938.44  | 469.73         |
| 2074.09 | 1037.55        | 22 | m      | 7  | 823.42  | 412.21         |
| 2221.12 | 1111.07        | 23 | m      | 6  | 676.38  | 338.69         |
| 2292.16 | 1146.58        | 24 | A      | 5  | 529.35  | 265.18         |
| 2405.25 | 1203.13        | 25 | L      | 4  | 458.31  | 229.66         |
| 2518.33 | 1259.67        | 26 | L      | 3  | 345.22  | 173.12         |
| 2575.35 | 1288.18        | 27 | G      | 2  | 232.14  | 116.57         |
| ---     | ---            | 28 | R      | 1  | 175.12  | 88.06          |

### DVU2580\_LGVLTGDLR

Experiment ID: L23015\_71\_1270 ; Experiment Type: INSOL; Mass spectrometer: Orbitrap  
m/z: 472.282; TheorMW (Da): 942.5499; delta: -0.4 ppm; missed cleav: 0; mods: none;  
IonScore: 22.23; expect value: 2.42E-02

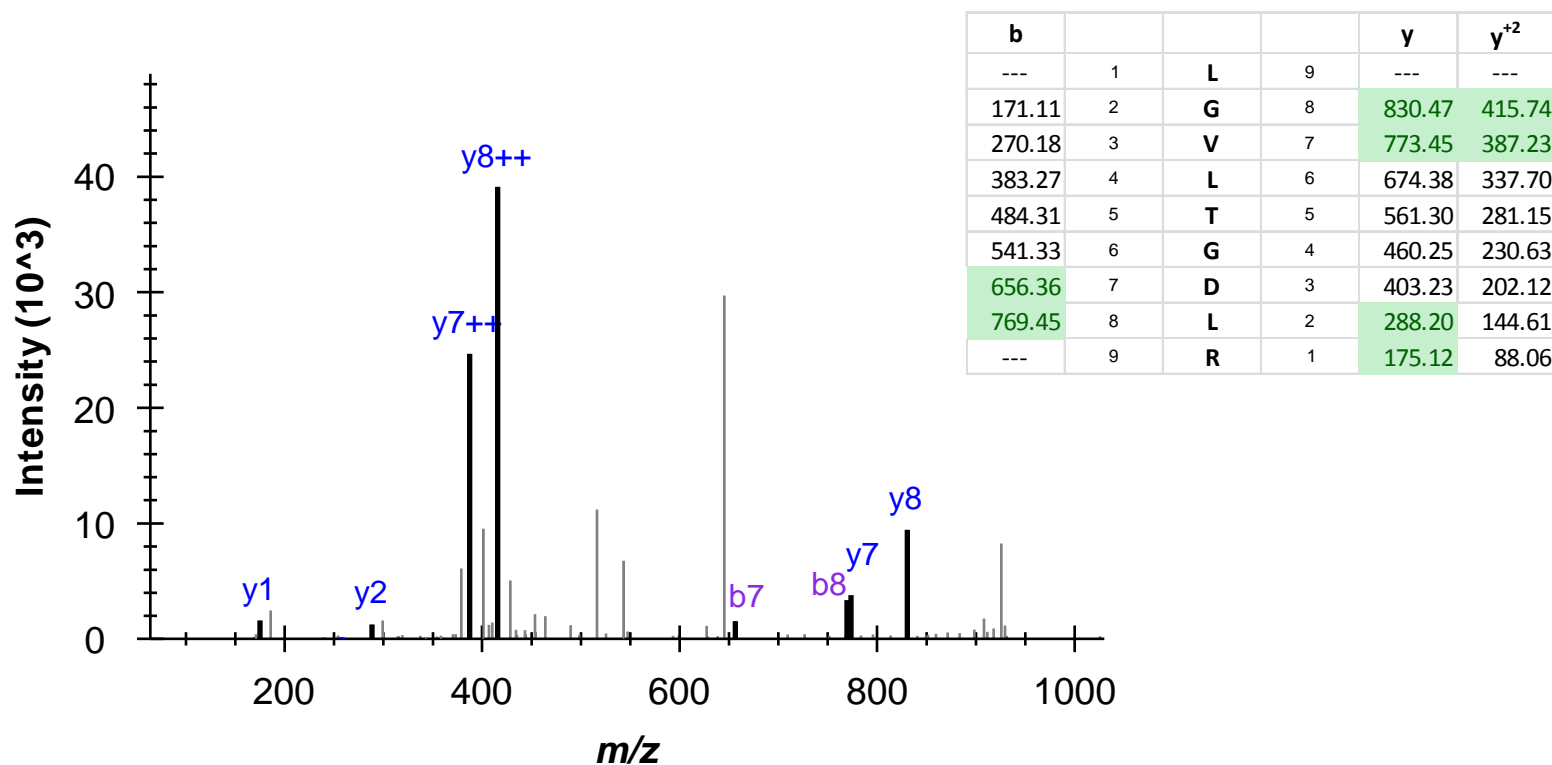

# DVU2604\_QMAQRYGEAR

Experiment ID: L3958\_15\_156 ; Experiment Type: INSOL; Mass spectrometer: LTQ  
m/z: 605.53; TheorMW (Da): 1209.56; delta: -421.9 ppm; missed cleav: 1; mods: 1 Deamidated (NQ);  
IonScore: 33.4; expect value: 2.5E-02

| b       | b <sup>+</sup> |    |      |    | y       | y <sup>+</sup> |
|---------|----------------|----|------|----|---------|----------------|
| ---     | ---            | 1  | Q    | 10 | ---     | ---            |
| 260.11  | ---            | 2  | M    | 9  | 1082.50 | 541.76         |
| 331.14  | ---            | 3  | A    | 8  | 951.46  | 476.24         |
| 460.19  | ---            | 4  | Q->E | 7  | 880.43  | 440.72         |
| 616.29  | 308.65         | 5  | R    | 6  | 751.38  | 376.20         |
| 779.35  | 390.18         | 6  | Y    | 5  | 595.28  | 298.15         |
| 836.37  | 418.69         | 7  | G    | 4  | 432.22  | 216.61         |
| 965.41  | 483.21         | 8  | E    | 3  | 375.20  | 188.10         |
| 1036.45 | 518.73         | 9  | A    | 2  | 246.16  | 123.58         |
| ---     | ---            | 10 | R    | 1  | 175.12  | 88.06          |

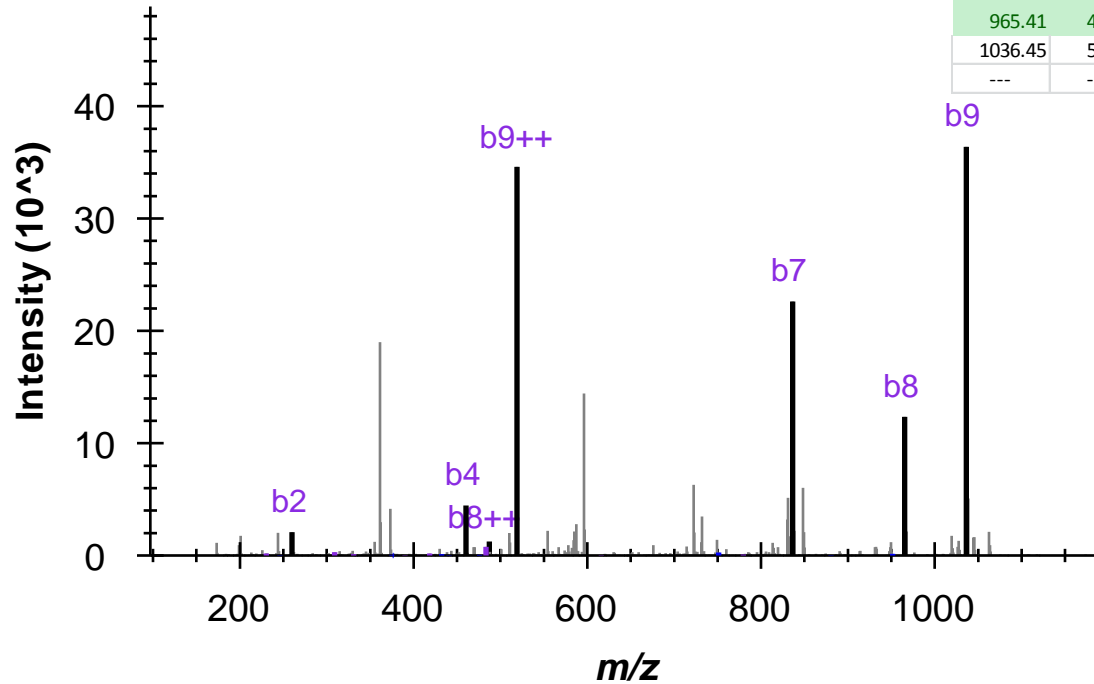



### DVU2667\_IMTQNAAIR

Experiment ID: L11183\_39\_735 ; Experiment Type: INSOL; Mass spectrometer: Orbitrap  
m/z: 509.77; TheorMW (Da): 1017.5277; delta: -2.2 ppm; missed cleav: 0; mods: Deamidation (NQ);  
IonScore: 24.07; expect value: 3.09E-02

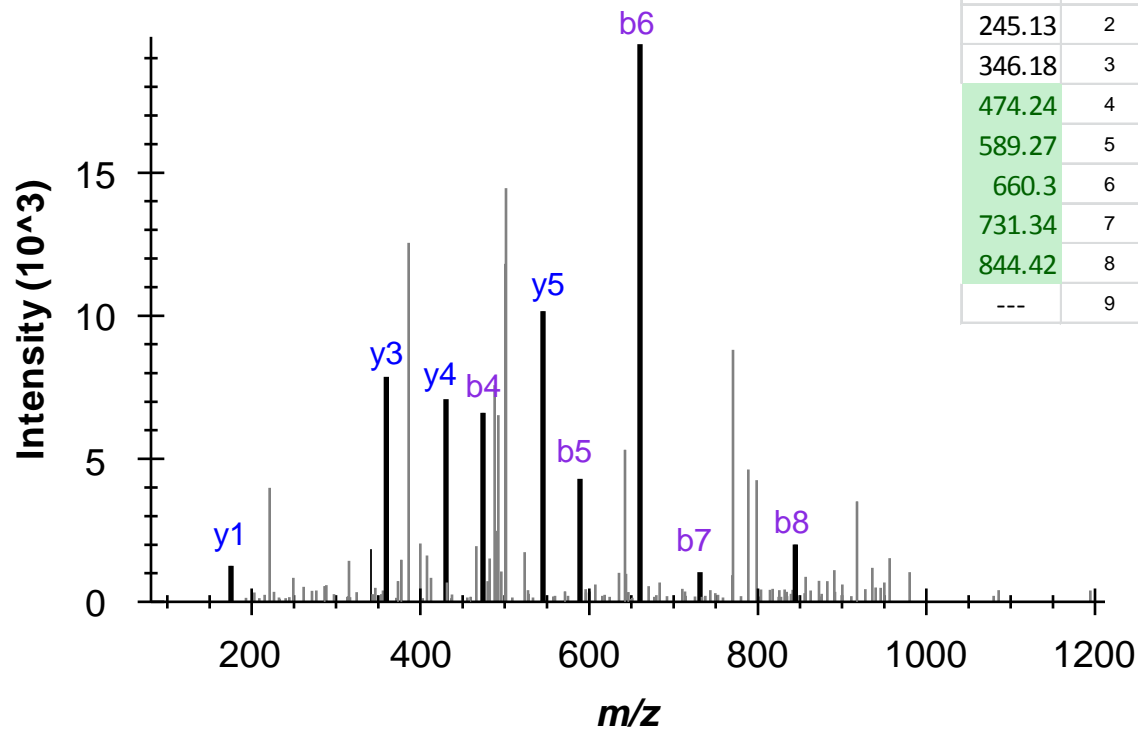

| b      |   |      |   | y      | y <sup>+</sup> |
|--------|---|------|---|--------|----------------|
| ---    | 1 | I    | 9 | ---    | ---            |
| 245.13 | 2 | M    | 8 | 905.45 | 453.23         |
| 346.18 | 3 | T    | 7 | 774.41 | 387.71         |
| 474.24 | 4 | Q    | 6 | 673.36 | 337.19         |
| 589.27 | 5 | N->D | 5 | 545.3  | 273.16         |
| 660.3  | 6 | A    | 4 | 430.28 | 215.64         |
| 731.34 | 7 | A    | 3 | 359.24 | 180.12         |
| 844.42 | 8 | I    | 2 | 288.2  | 144.61         |
| ---    | 9 | R    | 1 | 175.12 | 88.06          |

### DVU2685\_MLLAR

Experiment ID: L3975\_15\_157 ; Experiment Type: INSOL; Mass spectrometer: LTQ  
m/z: 619.38; TheorMW (Da): 618.35; delta: 32.3 ppm; missed cleav: 0; mods: Oxidation (M);  
IonScore: 29.78; expect value: 3.80E-02  
Competitor IDs: DVU0847\_IFIVK; DVU1705\_IFLVK

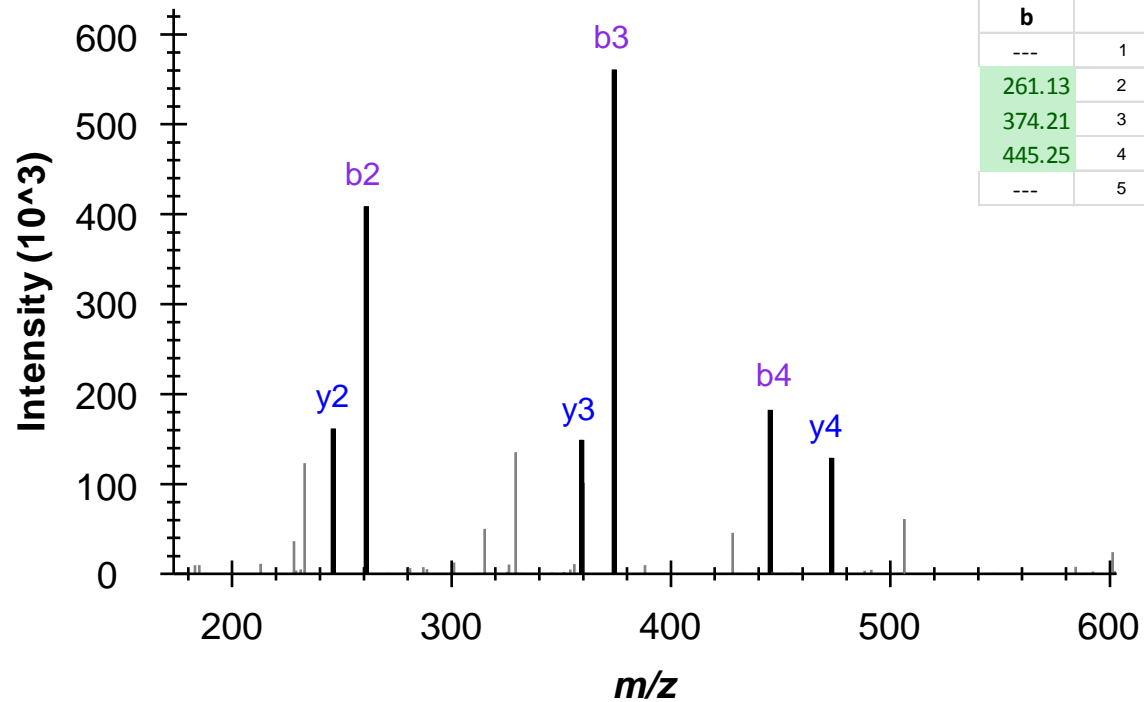

| b      |   |   |   | y      |
|--------|---|---|---|--------|
| ---    | 1 | m | 5 | ---    |
| 261.13 | 2 | L | 4 | 472.32 |
| 374.21 | 3 | L | 3 | 359.24 |
| 445.25 | 4 | A | 2 | 246.16 |
| ---    | 5 | R | 1 | 175.12 |

# DVU2747\_QIIPVR

Experiment ID: L11982\_41\_782 ; Experiment Type: INSOL; Mass spectrometer: Orbitrap  
m/z: 354.724; TheorMW (Da): 707.4331; delta: 0.6 ppm; missed cleav: 0; mods: Pyro-glu (N-term Q);  
IonScore: 22.11; expect value: 6.15E-03

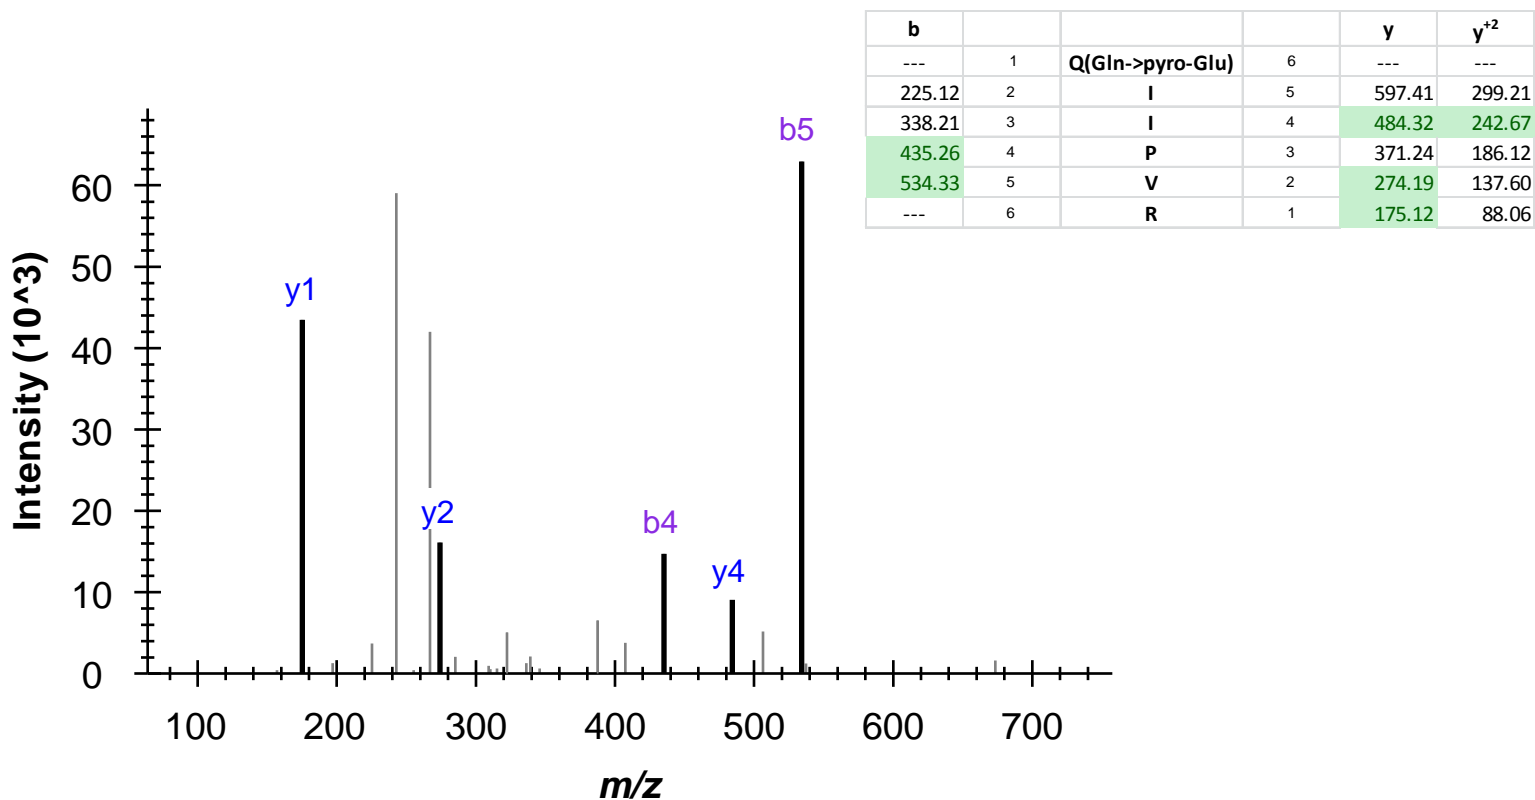

### DVU2951\_LNATTPR

Experiment ID: L22250\_72\_1281 ; Experiment Type: INSOL; Mass spectrometer: Orbitrap  
m/z: 387.211; TheorMW (Da): 772.4079; delta: -0.6 ppm; missed cleav: 0; mods: Deamidation (NQ);  
IonScore: 29.62; expect value: 1.94E-02

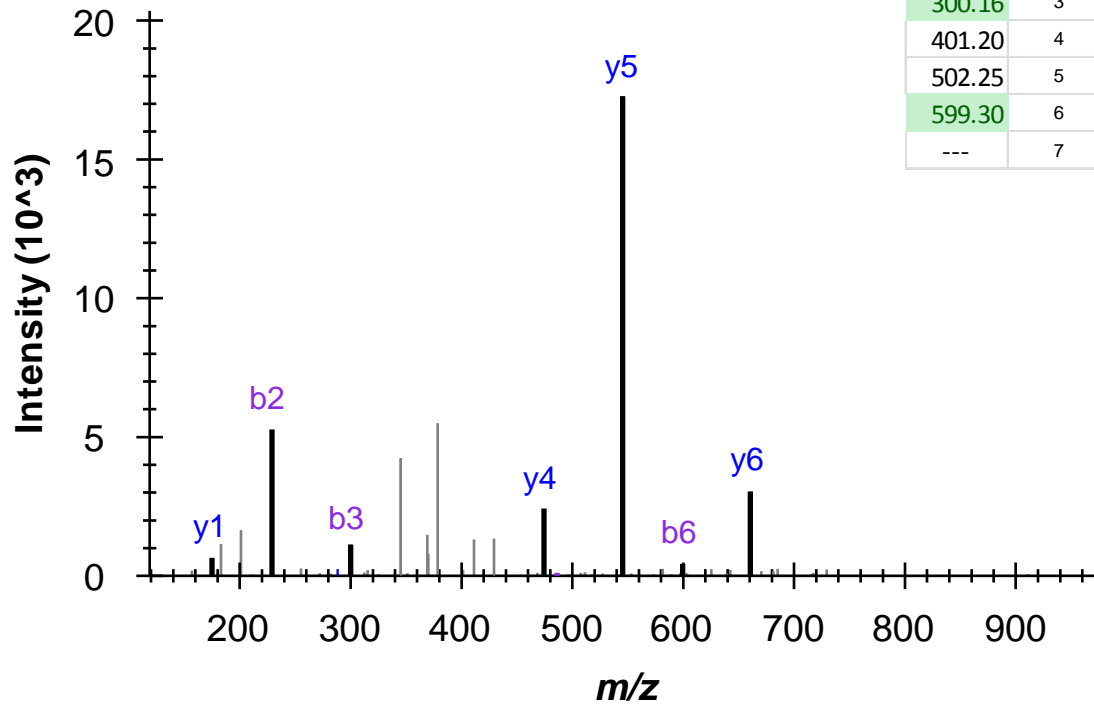

| b      |   |      |   | y      | y <sup>+</sup> |
|--------|---|------|---|--------|----------------|
| ---    | 1 | L    | 7 | ---    | ---            |
| 229.12 | 2 | N->D | 6 | 660.33 | 330.67         |
| 300.16 | 3 | A    | 5 | 545.30 | 273.16         |
| 401.20 | 4 | T    | 4 | 474.27 | 237.64         |
| 502.25 | 5 | T    | 3 | 373.22 | 187.11         |
| 599.30 | 6 | P    | 2 | 272.17 | 136.59         |
| ---    | 7 | R    | 1 | 175.12 | 88.06          |

### DVUA0021\_EDLERAQR

Experiment ID: L7732\_28\_420 ; Experiment Type: INGEL; Mass spectrometer: LTQ  
m/z: 508.857; TheorMW (Da): 1015.5047; delta: 191.8 ppm; missed cleav: 1; mods: none;  
IonScore: 41.12; expect value: 1.40E-02

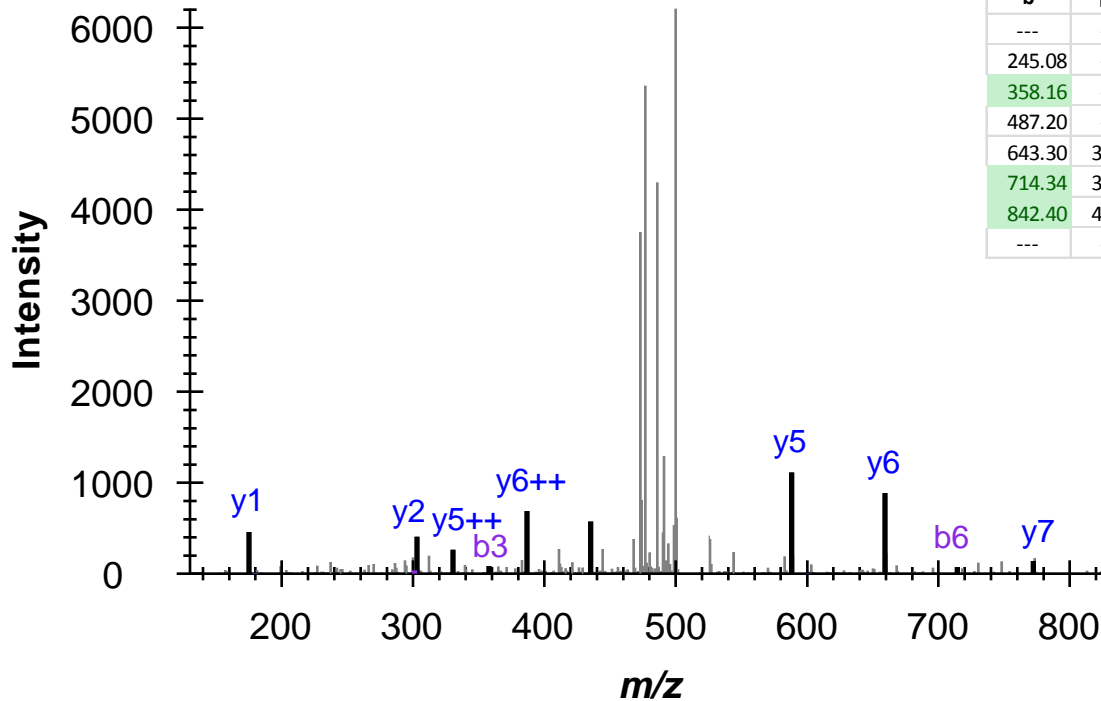

| b      | b <sup>+2</sup> |   |          |   | y      | y <sup>+2</sup> |
|--------|-----------------|---|----------|---|--------|-----------------|
| ---    | ---             | 1 | <b>E</b> | 8 | ---    | ---             |
| 245.08 | ---             | 2 | <b>D</b> | 7 | 887.47 | 444.24          |
| 358.16 | ---             | 3 | <b>L</b> | 6 | 772.44 | 386.72          |
| 487.20 | ---             | 4 | <b>E</b> | 5 | 659.36 | 330.18          |
| 643.30 | 322.16          | 5 | <b>R</b> | 4 | 530.32 | 265.66          |
| 714.34 | 357.67          | 6 | <b>A</b> | 3 | 374.21 | 187.61          |
| 842.40 | 421.70          | 7 | <b>Q</b> | 2 | 303.18 | 152.09          |
| ---    | ---             | 8 | <b>R</b> | 1 | 175.12 | 88.06           |

# DVUA0026\_QCLMPSSSETTLR

Experiment ID: L8446\_30\_559 ; Experiment Type: INSOL; Mass spectrometer: Orbitrap  
m/z: 812.844; TheorMW (Da): 1623.724; delta: 30.4ppm; missed cleav: 0; mods: [QC-16], Oxidation (M);  
IonScore: 16.87; expect value: 2.8E-02

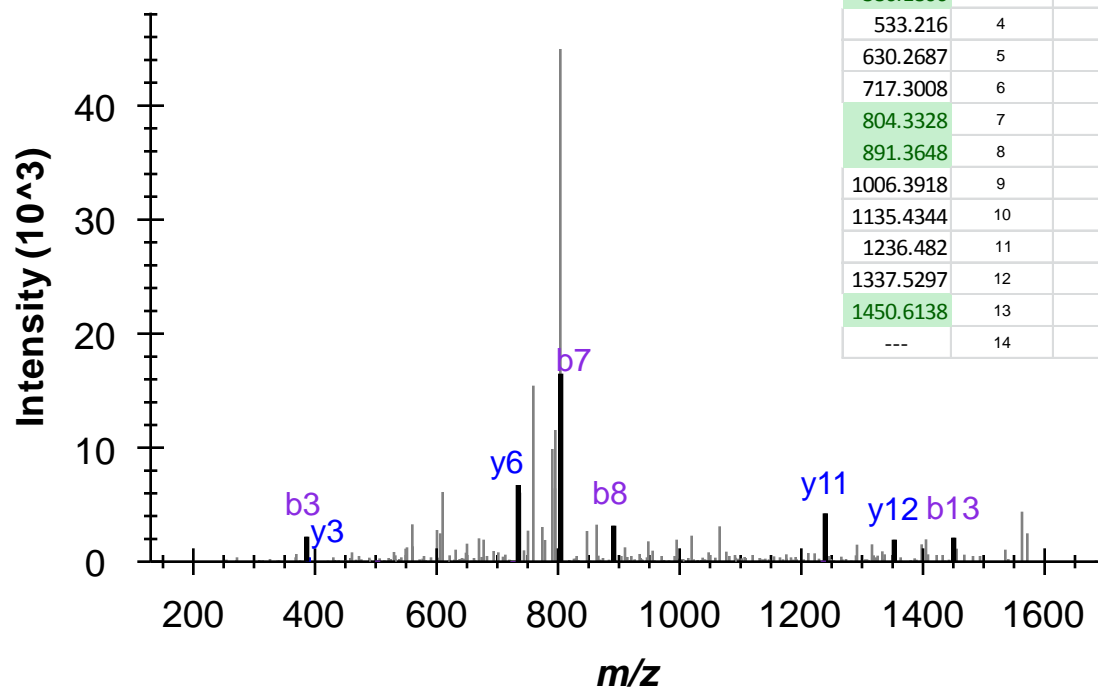

| b         |    |                    |    | y         | y <sup>+2</sup> |
|-----------|----|--------------------|----|-----------|-----------------|
| ---       | 1  | Q(-16)             | 14 | ---       | ---             |
| 273.0965  | 2  | C(Carbamidomethyl) | 13 | 1512.6669 | 756.8371        |
| 386.1806  | 3  | L                  | 12 | 1352.6362 | 676.8217        |
| 533.216   | 4  | m                  | 11 | 1239.5522 | 620.2797        |
| 630.2687  | 5  | P                  | 10 | 1092.5168 | 546.762         |
| 717.3008  | 6  | S                  | 9  | 995.464   | 498.2356        |
| 804.3328  | 7  | S                  | 8  | 908.432   | 454.7196        |
| 891.3648  | 8  | S                  | 7  | 821.3999  | 411.2036        |
| 1006.3918 | 9  | D                  | 6  | 734.3679  | 367.6876        |
| 1135.4344 | 10 | E                  | 5  | 619.341   | 310.1741        |
| 1236.482  | 11 | T                  | 4  | 490.2984  | 245.6528        |
| 1337.5297 | 12 | T                  | 3  | 389.2507  | 195.129         |
| 1450.6138 | 13 | L                  | 2  | 288.203   | 144.6051        |
| ---       | 14 | R                  | 1  | 175.119   | 88.0631         |

### DVUA0145\_QFGDVLV

Experiment ID: L9789\_35\_655 ; Experiment Type: INSOL; Mass spectrometer: Orbitrap  
m/z: 418.22; TheorMW (Da): 834.4236; delta: 2.3 ppm; missed cleav: 0; mods: Deamidation (NQ);  
IonScore: 24.24; expect value: 3.20E-02

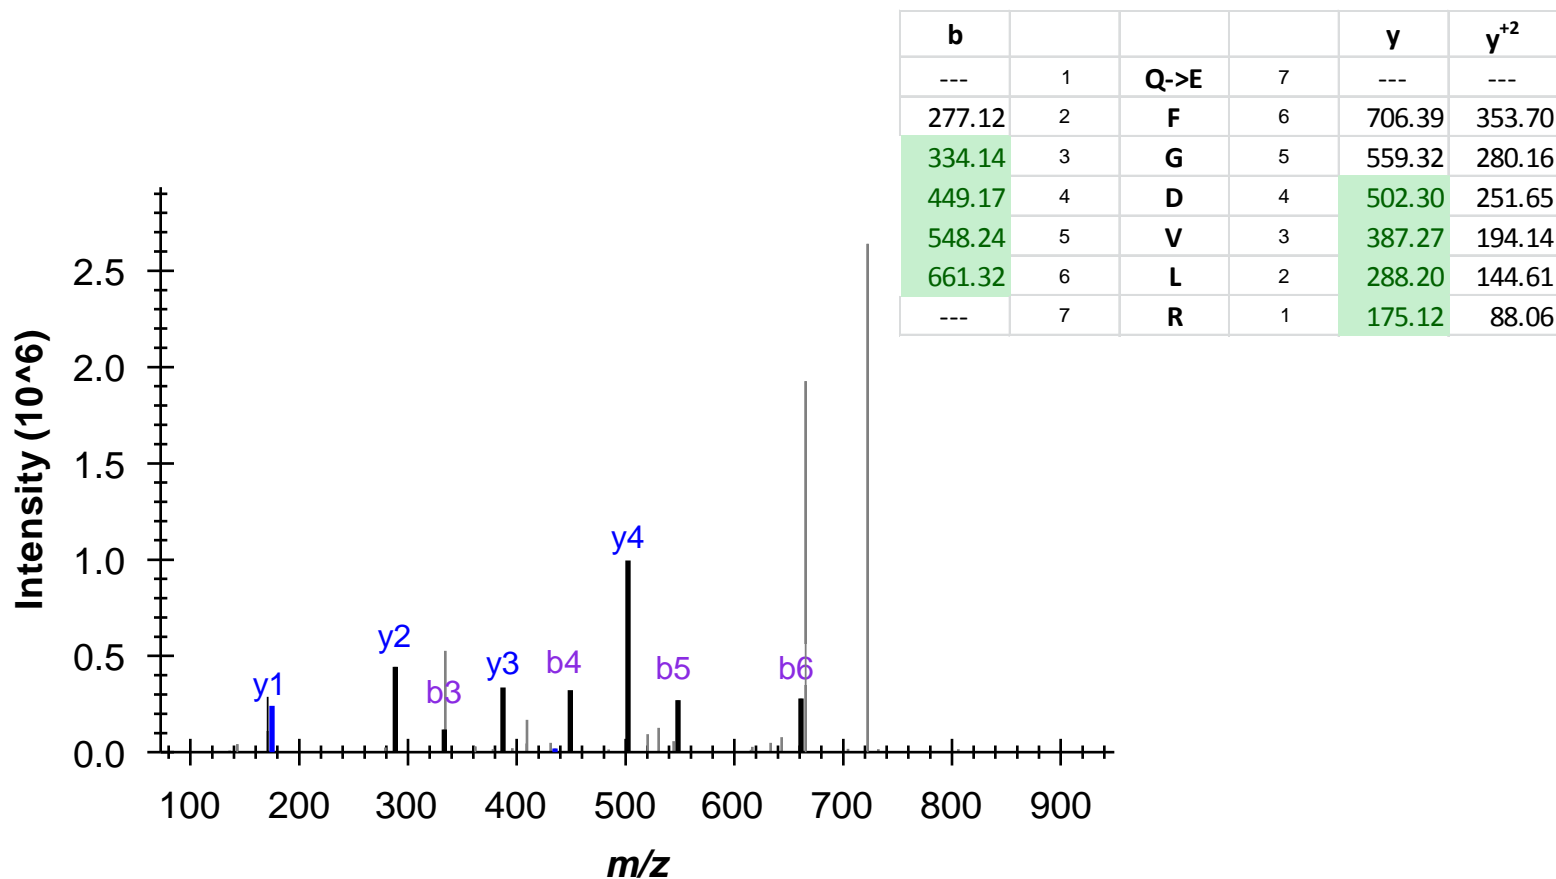

Supplement: 10.1074_M115.054692_mcp.M115.054692-5.pdf [file 10.1074_M115.054692_mcp.M115.054692-5.pdf]
